# Supplementary material for: Plant Natural Flavonoids Against Multidrug Resistant Pathogens
Source: PubMed Central journal article supplement (PMC8336499; doi:10.1002/advs.202100749), 2021-05-26
Supplement: ADVS-8-2100749-s001.pdf [file ADVS-8-2100749-s001.pdf]

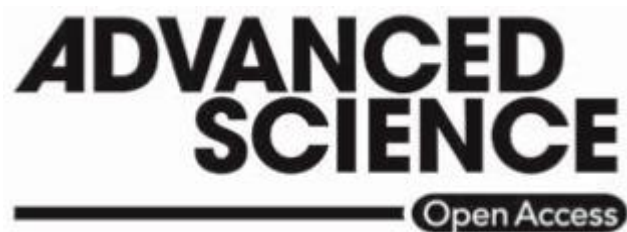

## Supporting Information

for *Adv. Sci.*, DOI: 10.1002/advs.202100749

Plant natural flavonoids against multidrug resistant pathogens

*Meirong Song,<sup>†</sup> Ying Liu,<sup>†</sup> Tingting Li,<sup>†</sup> Xiaojia Liu, Zihui Hao, Shuangyang Ding, Pharkphoom Panichayupakaranant, Kui Zhu,<sup>\*</sup> Jianzhong Shen<sup>\*</sup>*

## Supporting Information

### **Plant natural flavonoids against multidrug resistant pathogens**

*Meirong Song,<sup>†</sup> Ying Liu,<sup>†</sup> Tingting Li,<sup>†</sup> Xiaojia Liu, Zihui Hao, Shuangyang Ding, Pharkphoom Panichayupakaranant, Kui Zhu,<sup>\*</sup> Jianzhong Shen<sup>\*</sup>*

Dr M. R. Song, Y. Liu, Dr T. T. Li, X. J. Liu, Prof. K. Zhu, Prof. J. Z. Shen  
National Center for Veterinary Drug Safety Evaluation, College of Veterinary  
Medicine, China Agricultural University, Beijing 100193, China  
**E-mail:** zhuk@cau.edu.cn (K.Z.); sjz@cau.edu.cn (J.S.)

Prof. Z. H. Hao, Prof. K. Zhu  
Center of Research and Innovation of Chinese Traditional Veterinary Medicine, China  
Agricultural University, Beijing 100193, China

Prof. S. Y. Ding, Prof. J. Z. Shen  
Beijing Key Laboratory of Detection Technology for Animal-Derived Food Safety  
and Beijing Laboratory for Food Quality and Safety, China Agricultural University,  
Beijing 100193, China

Prof. P. Panichayupakaranant  
Department of Pharmacognosy and Pharmaceutical Botany, Faculty of  
Pharmaceutical Sciences, Prince of Songkla University, Hat-Yai, Songkhla 90112,  
Thailand

<sup>†</sup>These authors contributed equally to this work.

**Table S1.** Bacteria strains used in this study.

| Strains                                          | Description                                                                                                                                                                                                                         | Reference  |
|--------------------------------------------------|-------------------------------------------------------------------------------------------------------------------------------------------------------------------------------------------------------------------------------------|------------|
| <b>Gram-positive bacteria</b>                    |                                                                                                                                                                                                                                     |            |
| <i>Staphylococcus aureus</i> ATCC 29213          | MSSA                                                                                                                                                                                                                                | [1]        |
| <i>S. aureus</i> T144                            | MRSA [ <i>mecA</i> , <i>tet(A)</i> ]                                                                                                                                                                                                | [1]        |
| <i>S. aureus</i> 65322                           | MRSA                                                                                                                                                                                                                                | This study |
| <i>Enterococcus faecium</i> CAU 382              | VRE <sub>fm</sub>                                                                                                                                                                                                                   | This study |
| <i>E. faecium</i> CAU 383                        | VRE <sub>fm</sub>                                                                                                                                                                                                                   | This study |
| <i>E. faecium</i> CAU 369                        | VRE <sub>fm</sub>                                                                                                                                                                                                                   | This study |
| <b>Gram-negative bacteria</b>                    |                                                                                                                                                                                                                                     |            |
| <i>Acinetobacter baumannii</i> 17                | <i>mcr-1</i>                                                                                                                                                                                                                        | [2]        |
| <i>Acinetobacter baumannii</i> 7-2               | Wildtype                                                                                                                                                                                                                            | This study |
| <i>Acinetobacter baumannii</i> 7-2 LPS-resistant | LPS deficient; colistin resistant                                                                                                                                                                                                   | This study |
| <i>Citrobacter freundii</i> 2-4                  | <i>mcr-1</i>                                                                                                                                                                                                                        | [2]        |
| <i>Escherichia coli</i> ATCC 25922               |                                                                                                                                                                                                                                     | [2]        |
| <i>E. coli</i> B2                                | <i>mcr-1</i> , <i>bla</i> <sub>NDM-5</sub> , <i>bla</i> <sub>TEM-1B</sub> , <i>bla</i> <sub>OXA-10</sub> , <i>bla</i> <sub>CTX-M-14</sub> , <i>tet(A)</i> , <i>aadA</i> , <i>ahp(4)</i> , <i>oqxAB</i> , <i>mdfA</i> , <i>fosA3</i> | [2]        |
| <i>E. coli</i> G6                                | <i>bla</i> <sub>NDM-5</sub> , <i>tet(A)</i>                                                                                                                                                                                         | [2]        |
| <i>E. coli</i> 15-1x                             | Wildtype                                                                                                                                                                                                                            | This study |
| <i>E. coli</i> 6-2x                              | Wildtype                                                                                                                                                                                                                            | This study |
| <i>E. coli</i> ZJ134                             | <i>mcr-1</i> , <i>aac3</i> , <i>aadA2</i> , <i>aph(3)</i> , <i>ampC</i> , <i>bla</i> <sub>CTX-M-14</sub> , <i>dfrA</i> , <i>fosA</i> , <i>mphA</i> , <i>strA</i> , <i>tet(A)</i> , <i>flo</i> <sup>R</sup>                          | [2-3]      |
| <i>E. coli</i> ZJ33                              | <i>mcr-1</i> , <i>aac3</i> , <i>aadA2</i> , <i>aph(3)</i> , <i>aph(4)</i> , <i>ampC</i> , <i>bla</i> <sub>CTX-M-64</sub> , <i>bla</i> <sub>TEM-33</sub> , <i>mphA</i> , <i>oxa-10</i> , <i>fosA</i> , <i>tet(A)</i>                 | [2-3]      |
| <i>E. coli</i> ZJ478                             | <i>mcr-1</i> , <i>aac3</i> , <i>aadA5</i> , <i>ampC</i> , <i>bla</i> <sub>CTX-M-55</sub> ,                                                                                                                                          | [2-3]      |

---

|                                                 | <i>bla<sub>ndm-5</sub>, mphA, tet(A)</i> |            |
|-------------------------------------------------|------------------------------------------|------------|
| <i>Enterobacter cloacae</i> 16-15               | <i>mcr-1</i>                             | [2]        |
| <i>Klebsiella pneumoniae</i> ATCC 43816         |                                          | [4]        |
| <i>K. pneumoniae</i> 43816 $\Delta$ <i>waaC</i> | <i>waaC</i> knockout                     | This study |
| <i>K. pneumoniae</i> 4-20                       | <i>mcr-1</i>                             | [2]        |
| <i>Pseudomonas aeruginosa</i> PAO1              |                                          | [5]        |
| <i>Providencia alcalifaciens</i> 16-1           | <i>mcr-1</i>                             | [2]        |
| <i>Raoultella ornithinolytica</i> 16-8          | <i>mcr-1</i>                             | [2]        |
| <i>Raoultella planticola</i> 16-15              | <i>mcr-1</i>                             | [2]        |
| <i>Serratia marcescens</i> 16-99                | <i>mcr-1</i>                             | [2]        |
| <i>Salmonella enteritidis</i> SH30              | <i>mcr-1</i>                             | [2]        |

---

ATCC, American Type Culture Collection; MRSA, methicillin-resistant *Staphylococcus aureus*; MSSA, methicillin-sensitive *Staphylococcus aureus*; VRE, vancomycin-resistant *Enterococcus faecium*; *mcr-1*, mobile colistin resistance gene; *tetA*, tetracyclines resistant gene; *bla<sub>NDM-5</sub>*, carbapenems resistant gene; *bla<sub>TEM-1B</sub>*, penicillins resistant gene; *bla<sub>OXA-10</sub>*, carbapenems resistant gene; *bla<sub>CTX-M-14</sub>*,  $\beta$ -lactams especially cefotaxim resistant gene; *aadA*, aminoglycosides resistant gene; *ahp(4)*, hygromycin B resistant gene; *oqxAB*, quinolones resistant gene; *mdfA*, cationic or zwitterionic lipophilic compounds resistant gene; *fosA3*, fosfomycin resistant gene.

**Table S2.** Antibacterial activities and prenylation characteristics of 85 flavonoids.

| Compound                         | Prenylation |          | LogP <sup>†</sup> | MIC (µg mL <sup>-1</sup> ) |              |                      | Colistin <sup>a</sup> | FICI <sup>b</sup> | Plant origin                                                                                                                                                                                                                                                                                                                                                                 |
|----------------------------------|-------------|----------|-------------------|----------------------------|--------------|----------------------|-----------------------|-------------------|------------------------------------------------------------------------------------------------------------------------------------------------------------------------------------------------------------------------------------------------------------------------------------------------------------------------------------------------------------------------------|
|                                  | n           | Position |                   | MSSA<br>ATCC 29213         | MRSA<br>T144 | <i>E. coli</i><br>B2 |                       |                   |                                                                                                                                                                                                                                                                                                                                                                              |
| <b>Flavones</b>                  |             |          |                   |                            |              |                      |                       |                   |                                                                                                                                                                                                                                                                                                                                                                              |
| Albanin A <sup>c</sup>           | 1           | 3        | 3.96              | 32                         | 32           | >128                 | 4                     | 0.53              | <i>Artocarpus styracifolius</i> , <i>Artocarpus heterophyllus</i> , <i>Morus nigra</i> , <i>Artocarpus nitidus</i> , <i>Artocarpus gomezianus</i> , <i>Brosimopsis oblongifolia</i> <sup>[6-14]</sup>                                                                                                                                                                        |
| Artocarpin <sup>d</sup>          | 2           | 3, 6     | 6.28              | 1                          | 2            | >128                 | 0.25                  | 0.06              | <i>Artocarpus heterophyllus</i> , <i>Artocarpus gomezianus</i> , <i>Artocarpus nitidus</i> <sup>[6-8,10]</sup>                                                                                                                                                                                                                                                               |
| Brousoflavonol<br>F <sup>c</sup> | 2           | 3', 8    | 6.67              | 16                         | 16           | >128                 | 4                     | 0.53              | <i>Macaranga indica</i> , <i>Macaranga barteri</i> , <i>Macaranga recurvata</i> , <i>Broussonetia papyrifera</i> , <i>Formosan Broussonetia papyrifera</i> , <i>Tetragonula affbiroi</i> <sup>[15-20]</sup>                                                                                                                                                                  |
| Corylifol C <sup>c</sup>         | 1           | 8        | 4.52              | 16                         | 64           | >128                 | 8                     | 1.03              | <i>Psoralea corylifolia</i> , <i>Ershen pill</i> <sup>[21,22]</sup>                                                                                                                                                                                                                                                                                                          |
| Isolicoflavonol <sup>c</sup>     | 1           | 3'       | 4.42              | >128                       | >128         | >128                 | 8                     | 1.03              | <i>Glycyrrhiza uralensis</i> , <i>Daphne giraldii</i> , <i>Trollius chinensis</i> , <i>Scutellaria baicalensis</i> , <i>Macaranga indica</i> , <i>Engelhardtia roxburghiana</i> , <i>Glycyrrhiza glabra</i> , <i>Morus cathayana</i> , <i>Morus australis</i> , <i>Broussonetia papyrifera</i> , <i>Macatanga conifer</i> , <i>Platanus acerifolia</i> <sup>[19,23-29]</sup> |
| 5'-Geranyl-<br>5,7,2',4'-        | 2           | 5', 5'   | 6.27              | 2                          | 2            | >128                 | 0.50                  | 0.09              | <i>Morus lhou</i> , <i>Morus nigra</i> <sup>[30,31]</sup>                                                                                                                                                                                                                                                                                                                    |

|                                                                    |   |           |      |      |      |      |      |      |                                                                                                                                                                           |  |
|--------------------------------------------------------------------|---|-----------|------|------|------|------|------|------|---------------------------------------------------------------------------------------------------------------------------------------------------------------------------|--|
| Tetrahydroxyflavone <sup>c</sup>                                   |   |           |      |      |      |      |      |      |                                                                                                                                                                           |  |
| Gancaonin O <sup>c</sup>                                           | 1 | 6         | 4.22 | 4    | 4    | >128 | 2    | 0.28 | Chemical synthesis                                                                                                                                                        |  |
| 5,7,4'-Trihydroxy-3,6-dimethoxy-3',5'-diprenylflavone <sup>c</sup> | 2 | 3', 5'    | 6.29 | 64   | 32   | >128 | 8    | 1.03 | <i>Dodonaea viscosa</i> , <i>Dodonaea polyandra</i> <sup>[32,33]</sup>                                                                                                    |  |
| 8,3'-Diprenylapigenin <sup>c</sup>                                 | 2 | 3', 8     | 6.96 | >128 | >128 | >128 | 4    | 0.53 | <i>Epimedium koreanum</i> , <i>Epimedium agittatum</i> , <i>Morus alba</i> , <i>Epimedium btevicornum</i> <sup>[34-36]</sup>                                              |  |
| 3'-Geranyl-3-prenyl-5,7,2',4'-Tetrahydroxyflavone <sup>c</sup>     | 3 | 3', 3', 3 | 7.54 | 4    | 4    | >128 | 1    | 0.16 | <i>Morus alba</i> <sup>[37]</sup>                                                                                                                                         |  |
| Kuwanon A <sup>d</sup>                                             | 2 | 3', 3     | 5.84 | 4    | 8    | >128 | 0.25 | 0.06 | <i>Psoralea corylifolia</i> , <i>Morus atropurpurea</i> , <i>Morus australis</i> , <i>Morus lhou</i> , <i>Morus multicaulis</i> , <i>Morus alba</i> <sup>[38-41]</sup>    |  |
| Licoflavone A <sup>d</sup>                                         | 1 | 6         | 5.00 | >128 | >128 | >128 | 4    | 0.53 | <i>Glycyrrhiza inflata</i> , <i>Glycyrrhiza uralensis</i> <sup>[42,43]</sup>                                                                                              |  |
| Licoflavone B <sup>d</sup>                                         | 2 | 3', 6     | 7.26 | 32   | 32   | >128 | 4    | 0.53 | <i>Glycyrrhiza inflata</i> <sup>[43-46]</sup>                                                                                                                             |  |
| Licoflavone C <sup>d</sup>                                         | 1 | 8         | 4.71 | 32   | 64   | >128 | 8    | 1.03 | <i>Morus alba</i> , <i>Retama raetam</i> , <i>Mori Cortex</i> , <i>Genista morisii</i> , <i>Genista ephedroides</i> , <i>Glycyrrhiza inflata</i> <sup>[43,45,47-51]</sup> |  |
| Licoflavonol <sup>c</sup>                                          | 1 | 6         | 4.42 | 8    | 8    | >128 | 1    | 0.16 | <i>Glycyrrhiza uralensis</i> , <i>Maclura tinctoria</i> <sup>[52-55]</sup>                                                                                                |  |
| Morin <sup>d</sup>                                                 | 0 | —         | 1.88 | 64   | 32   | >128 | 16   | 2.03 | <i>Cortex Mori</i> <sup>[54-57]</sup>                                                                                                                                     |  |
| Morusin <sup>d</sup>                                               | 2 | 3, 8      | 5.64 | 8    | 8    | >128 | 0.25 | 0.06 | <i>Morus alba</i> , <i>Cortex Mori</i> , <i>Morus</i>                                                                                                                     |  |

|                                                       |   |      |      |      |      |      |      |      |                                                                                                                                                                                                                                                                                                                                                                                                                                                                                                                       |
|-------------------------------------------------------|---|------|------|------|------|------|------|------|-----------------------------------------------------------------------------------------------------------------------------------------------------------------------------------------------------------------------------------------------------------------------------------------------------------------------------------------------------------------------------------------------------------------------------------------------------------------------------------------------------------------------|
|                                                       |   |      |      |      |      |      |      |      | <i>atropurpurea, Mori Cortex</i> <sup>[38,40,48,50,57-59]</sup>                                                                                                                                                                                                                                                                                                                                                                                                                                                       |
| Mulberrin <sup>d</sup>                                | 2 | 3, 8 | 6.21 | 1    | 1    | >128 | 0.25 | 0.06 | <i>Morus alba, Morus atropurpurea</i> <sup>[57,60]</sup>                                                                                                                                                                                                                                                                                                                                                                                                                                                              |
| Oroxylin A <sup>c</sup>                               | 0 | —    | 2.96 | >128 | >128 | >128 | 8    | 1.03 | <i>Scutellaria baicalensis, Oroxylum indicum, Phyllodium pulchellum, Ligularia sagittal, Scutellaria luzonica, Scorzonera divaricata, Scutellaria intermedia, Lawsonia inermis, Astragalus membranaceus, Scutellariae radix, Scutellaria adenostegia, Kalimeris indica, Centaurea scoparia, Evodia lepta, Ornithogalum thyrsoides, Dichrocephala benthamii, Scutellaria regeliana, Centaurea omphalotricha, Scutellaria lateriflora, Lagochilus leiacanthus, Ardisia crispa, Eucommia ulmoides</i> <sup>[61-72]</sup> |
| 6-Prenylapigenin <sup>c</sup>                         | 1 | 6    | 4.71 | 32   | 32   | >128 | 4    | 0.53 | <i>Cudrania tricuspidata, Artocarpus heterophyllus, Garcinia xanthochymus, Dorstenia barteri, Dorstenia convexa, Dorstenia ciliata, Dorstenia dinklagei, Cannabis sativa</i> <sup>[6,73-79]</sup>                                                                                                                                                                                                                                                                                                                     |
| 6-Prenyl-<br>quercetin-3-<br>methylether <sup>c</sup> | 1 | 6    | 4.21 | 32   | 64   | >128 | 8    | 1.03 | <i>Hypericum japonicum, Glycyrrhiza uralensis, Sinopodophyllum emodi, Hypericum ightianum, Glycyrrhiza glabra</i> <sup>[53,80]</sup>                                                                                                                                                                                                                                                                                                                                                                                  |
| 8-Prenyl-<br>kaempferol <sup>c</sup>                  | 1 | 8    | 4.42 | 32   | 32   | >128 | 8    | 1.03 | <i>Macaranga barteri, Sophora flavescens, Epimedium koreanum</i> <sup>[81-86]</sup>                                                                                                                                                                                                                                                                                                                                                                                                                                   |

|                                                      |   |      |      |    |    |      |   |      |                                                                                                                                                                                                                                                                                                                                                                                                                                                                                                                                                                                            |
|------------------------------------------------------|---|------|------|----|----|------|---|------|--------------------------------------------------------------------------------------------------------------------------------------------------------------------------------------------------------------------------------------------------------------------------------------------------------------------------------------------------------------------------------------------------------------------------------------------------------------------------------------------------------------------------------------------------------------------------------------------|
| 5,7,2',4'-Tetrahydroxy-3-geranylflavone <sup>c</sup> | 2 | 3, 3 | 5.80 | 8  | 8  | >128 | 8 | 1.03 | <i>Broussonetia papyrifera</i> <sup>[87]</sup>                                                                                                                                                                                                                                                                                                                                                                                                                                                                                                                                             |
| <b>Isoflavones</b>                                   |   |      |      |    |    |      |   |      |                                                                                                                                                                                                                                                                                                                                                                                                                                                                                                                                                                                            |
| Eurycarpin A <sup>c</sup>                            | 1 | 3'   | 4.52 | 8  | 8  | >128 | 1 | 0.16 | <i>Chemical synthesis</i>                                                                                                                                                                                                                                                                                                                                                                                                                                                                                                                                                                  |
| Wighteone <sup>c</sup>                               | 1 | 6    | 4.52 | 8  | 8  | >128 | 2 | 0.28 | <i>Pueraria peduncularis, Lotus japonicus, Erythrina stricta, Erythrina suberosa, Lupinus angustifolius, Pueraria mirifica, Glycyrrhiza uralensis, Maclura tinctoria, Cudrania tricuspidata, Ficus tikoua, Erythrina fusca, Erythrina poeppigiana, Psoralea corylifolia, Erythrina variegata, Cudrania fruticosa, Lipinus mutabilis, Bolusanthus speciosus, Cudrania cochinchinensis, Sicilian Glycyrrhiza, Erythrina lysistemom, Erythrina indica, Erythrina arborescens, Genista ephedroides, Anthyllis hermanniae, Erythrina orientalis, Laburnum anagyroids</i> <sup>[52,88-106]</sup> |
| Luteone <sup>c</sup>                                 | 1 | 6    | 4.23 | 64 | 64 | >128 | 4 | 0.53 | <i>Erythrina stricta, Lupinus angustifolius, Lupinus reflexus, Laburnum anagyroids</i> <sup>[89,99,101,107]</sup>                                                                                                                                                                                                                                                                                                                                                                                                                                                                          |
| Sophora-isoflavone A <sup>c</sup>                    | 1 | 3'   | 3.87 | 32 | 32 | >128 | 4 | 0.53 | <i>Sophora mooracrotiana</i> <sup>[108,109]</sup>                                                                                                                                                                                                                                                                                                                                                                                                                                                                                                                                          |
| 8-Prenyldaidzein <sup>c</sup>                        | 1 | 8    | 4.81 | 32 | 32 | >128 | 4 | 0.53 | <i>Psoralea corylifolia, Erythrina fusca, Bituminaria morisiana, Bituminaria bituminosa, Erythrina indica,</i>                                                                                                                                                                                                                                                                                                                                                                                                                                                                             |



|                                   |   |      |      |      |      |      |     |      |                                                                                                                                                                                                                                                                                                                                                  |
|-----------------------------------|---|------|------|------|------|------|-----|------|--------------------------------------------------------------------------------------------------------------------------------------------------------------------------------------------------------------------------------------------------------------------------------------------------------------------------------------------------|
|                                   |   |      |      |      |      |      |     |      | <i>Erythrina sigmoidea</i> , <i>Erythrina eriотricha</i> <sup>[110-115]</sup>                                                                                                                                                                                                                                                                    |
| Lupiwighteone <sup>c</sup>        | 1 | 8    | 4.52 | 32   | >128 | >128 | 8   | 1.03 | <i>Vatairea guianensis</i> , <i>Glycyrrhiza glabra</i> , <i>Lotus pedunculatus</i> , <i>Ficus tikoua</i> , <i>Erythrina sigmoidea</i> , <i>Erythrina variegata</i> , <i>Glycyrrhiza glabra</i> , <i>Bolusanthus speciosus</i> , <i>Anthyllis hermanniae</i> <sup>[90,116-121]</sup>                                                              |
| Isowighteone <sup>c</sup>         | 1 | 3'   | 4.52 | 16   | 16   | >128 | 4   | 0.53 | <i>Lupinus albus</i> , <i>Psoralea corylifolia</i> <sup>[122]</sup>                                                                                                                                                                                                                                                                              |
| 6,8-Diprenyl-orobol <sup>c</sup>  | 2 | 6, 8 | 5.61 | 16   | 8    | >128 | 8   | 1.03 | <i>Cudrania tricuspidata</i> , <i>Flemingia philippinensis</i> , <i>Millettia pachycarpa</i> , <i>Glycyrrhiza uralensis</i> , <i>Maclura tinctoria</i> <sup>[104,123-126]</sup>                                                                                                                                                                  |
| Isonobava-isoflavone <sup>c</sup> | 0 |      | 4.39 | 4    | 4    | >128 | 0.5 | 0.09 | <i>Psoralea corylifolia</i> , <i>Erythrina sigmoidea</i> <sup>[127,128]</sup>                                                                                                                                                                                                                                                                    |
| 8-Prenylluteone <sup>c</sup>      | 2 | 6, 8 | 5.80 | 8    | 8    | >128 | 4   | 0.53 | <i>Erythrina senegalensis</i> , <i>Erythrina burttii</i> <sup>[129]</sup>                                                                                                                                                                                                                                                                        |
| Gancaonin M <sup>c</sup>          | 1 | 8    | 5.05 | 8    | 8    | >128 | 8   | 1.03 | <i>Deguelia costata</i> <sup>[130]</sup>                                                                                                                                                                                                                                                                                                         |
| Corylin <sup>d</sup>              | 1 | 3'   | 4.24 | >128 | >128 | >128 | 4   | 0.53 | <i>Psoralea corylifolia</i> , <i>Psoraleae fructus</i> , <i>Eragrostis ferruginea</i> , <i>Erythrina sigmoidea</i> <sup>[131-135]</sup>                                                                                                                                                                                                          |
| Isoflavone <sup>c</sup>           | 0 |      | 3.54 | >128 | >128 | >128 | 8   | 1.03 | <i>Ormosia henryi</i> , <i>Anaxagorea luzonensis</i> , <i>Dalbergia velutina</i> , <i>Peltophorum pterocarpum</i> , <i>Camphorosma lessingii</i> , <i>Pterocarpus marsupium</i> , <i>Millettia ferruginea</i> , <i>Pueraria lobata</i> , <i>Trifolium riograndense</i> , <i>Maclura tricuspidata</i> , <i>Ficus hispida</i> <sup>[136-142]</sup> |

|                                          |   |       |      |      |      |      |     |      |                                                                                                                                                                                                                                                                                                                                                   |
|------------------------------------------|---|-------|------|------|------|------|-----|------|---------------------------------------------------------------------------------------------------------------------------------------------------------------------------------------------------------------------------------------------------------------------------------------------------------------------------------------------------|
| 2,3-Dehydrokieveitone <sup>c</sup>       | 1 | 8     | 4.23 | >128 | >128 | >128 | 4   | 0.53 | <i>Maackia fauriei</i> , <i>Erythrina sacleuxii</i> <sup>[143,144]</sup>                                                                                                                                                                                                                                                                          |
| Warangalone <sup>c</sup>                 | 2 | 6, 8  | 5.73 | 8    | 2    | >128 | 4   | 0.53 | <i>Erythrina senegalensis</i> , <i>Cudrania tricuspidata</i> , <i>Maclura pomifera</i> , <i>Erythrina addisoniae</i> , <i>Erythrina sigmoidea</i> , <i>Millettia taiwaniana</i> , <i>Derris scandens</i> <sup>[145-151]</sup>                                                                                                                     |
| Lupalbigenin <sup>c</sup>                | 2 | 3', 6 | 6.77 | 1    | 1    | >128 | 0.5 | 0.09 | <i>Atalantia monophylla</i> , <i>Derris scandens</i> , <i>Cudrania tricuspidata</i> , <i>Ulex jussiaei</i> , <i>Sophora flavescens</i> , <i>Sophora microphylla</i> , <i>Anthyllis hermanniae</i> <sup>[104,152-158]</sup>                                                                                                                        |
| 6,8-Diprenylgenistein <sup>c</sup>       | 2 | 6, 8  | 6.09 | 4    | 2    | >128 | 2   | 0.28 | <i>Erythrina excelsa</i> , <i>Erythrina senegalensis</i> , <i>Cudrania tricuspidata</i> , <i>Streptococcus mutans</i> , <i>Glycyrrhiza uralensis</i> , <i>Erythrina caffra</i> , <i>Erythrina variegata</i> , <i>Erythrina sigmoidea</i> , <i>Erythrina eriotricha</i> <sup>[126,159-167]</sup>                                                   |
| 6,7,4'-Trihydroxyisoflavone <sup>c</sup> | 0 | —     | 2.07 | 64   | 16   | >128 | 8   | 1.03 | <i>Taxus media</i> , <i>Taxus mairei</i> , <i>Caragana changduensis</i> , <i>Bear bile</i> , <i>Soybean miso</i> , <i>Euchresta formosana</i> , <i>Fermented soybeans</i> <sup>[168-171]</sup>                                                                                                                                                    |
| Licoisoflavone A <sup>d</sup>            | 1 | 3'    | 4.23 | 32   | 32   | >128 | 1   | 0.16 | <i>Glycyrrhiza uralensis</i> , <i>Glycyrrhiza inflata</i> , <i>Azorella madreporica</i> , <i>Glycyrrhiza glabra</i> , <i>Lupinus texensis</i> , <i>Glycyrrhiza eurycarpa</i> , <i>Glycyrrhiza aspera</i> , <i>Echinosophora koreensis</i> , <i>Pueraria mirifica</i> , <i>Lupinus angustifolius</i> , <i>Phaseolus coccineus</i> <sup>[172-</sup> |

|                                     |   |       |      |      |      |      |      |      |                                                                                                                                                                                                                                                                                                                                                                                                                                                                               |
|-------------------------------------|---|-------|------|------|------|------|------|------|-------------------------------------------------------------------------------------------------------------------------------------------------------------------------------------------------------------------------------------------------------------------------------------------------------------------------------------------------------------------------------------------------------------------------------------------------------------------------------|
|                                     |   |       |      |      |      |      |      |      | 179]                                                                                                                                                                                                                                                                                                                                                                                                                                                                          |
| Neobava-<br>isoflavone <sup>d</sup> | 1 | 3'    | 4.81 | 128  | 128  | >128 | 16   | 2.06 | <i>Psoralea corylifolia</i> , <i>Erythrina sigmoidea</i> , <i>Erythrina excels</i> , <i>Erythrina senegalensis</i> , <i>Psoraleae fructus</i> , <i>Hedan tablet</i> , <i>Lespedeza cyrtobotrya</i> , <i>Erythrina abyssinica</i> , <i>Erythrina latissimi</i> , <i>Sopubia delphinifolia</i> <sup>[180-182]</sup>                                                                                                                                                             |
| <b>Flavanones</b>                   |   |       |      |      |      |      |      |      |                                                                                                                                                                                                                                                                                                                                                                                                                                                                               |
| Bavachin <sup>d</sup>               | 1 | 6     | 4.45 | 32   | 64   | >128 | 1    | 0.16 | <i>Psoralea corylifolia</i> , <i>Psoralea fructus</i> , <i>Millettia speciosa</i> , <i>Piper longum</i> <sup>[183]</sup>                                                                                                                                                                                                                                                                                                                                                      |
| Bavachinin A <sup>d</sup>           | 1 | 6     | 4.52 | 4    | 8    | >128 | 1    | 0.16 | <i>Psoralea corylifolia</i> , <i>Psoralea fructus</i> <sup>[184]</sup>                                                                                                                                                                                                                                                                                                                                                                                                        |
| Glabrol <sup>d</sup>                | 2 | 3', 8 | 6.70 | 1    | 1    | >128 | 0.12 | 0.06 | <i>Glycyrrhiza uralensis</i> , <i>Vernonia cinerea</i> , <i>Glycyrrhiza glabra</i> , <i>Glycyrrhiza inflata</i> , <i>Sophora tonkinensis</i> , <i>Astragalus monbeigii</i> , <i>Pistacia lentiscus</i> , <i>Pseudosophora alopecuroides</i> , <i>Sophora tonkinensis</i> , <i>Erythrina subumbrans</i> , <i>Euchresta formosana</i> , <i>Sophora prostrate</i> , <i>Euchresta japonica</i> , <i>Euchresta horsfieldii</i> , <i>Glycyrrhiza eurycarpa</i> <sup>[185-192]</sup> |
| Isobavachin <sup>d</sup>            | 1 | 8     | 4.45 | 128  | 128  | >128 | 1    | 0.16 | <i>Psoralea corylifolia</i> , <i>Psoralea fructus</i> , <i>Sanicula lamelligera</i> , <i>Erythrina sigmoidea</i> <sup>[53,117,191,193]</sup>                                                                                                                                                                                                                                                                                                                                  |
| Liquiritigenin <sup>d</sup>         | 0 | —     | 2.20 | >128 | >128 | >128 | 4    | 0.53 | <i>Erinacea anthyllis</i> , <i>Dalbergia tonkinensis</i> , <i>Erythrina caffra</i> , <i>Curcuma rotunda</i> , <i>Praxelis clematidea</i> , <i>Physails</i>                                                                                                                                                                                                                                                                                                                    |

|                                                            |   |       |      |      |      |      |     |      |                                                                                                                                                                                                                                                                  |
|------------------------------------------------------------|---|-------|------|------|------|------|-----|------|------------------------------------------------------------------------------------------------------------------------------------------------------------------------------------------------------------------------------------------------------------------|
|                                                            |   |       |      |      |      |      |     |      | <i>alkekengi, Gansuibanxia decoction, Spatholobus suberectus, Miletia dielsiana, Areca catechu, Miletia speciosa, Glycyrrhiza uralensis, Vigna luteola, Bauhinia forficata, Endocomia macrocoma, Licorice residues, Pongamia pinnata</i> <sup>[53,194-203]</sup> |
| 6-Prenyl-naringenin <sup>d</sup>                           | 1 | 6     | 4.16 | 8    | 8    | >128 | 0.5 | 0.09 | <i>Glycyrrhiza uralensis, Mallotus conspiratus, Cudrania tricuspidata, Humulus lupulus, Glycyrrhiza inflata, Aspergillus fumigatus, Psoralea corylifolia</i> <sup>[131,204-209]</sup>                                                                            |
| Cudra-flavanone B <sup>c</sup>                             | 1 | 6     | 4.08 | >128 | >128 | >128 | 8   | 1.03 | <i>Cudrania tricuspidata, Cudrania cochinchinensis</i> <sup>[210]</sup>                                                                                                                                                                                          |
| 3,7,4'-Trihydroxy-5-methoxy-8-prenylflavanone <sup>c</sup> | 1 | 8     | 3.52 | >128 | >128 | >128 | 8   | 1.03 | <i>Sophora flavescens</i> <sup>[211]</sup>                                                                                                                                                                                                                       |
| Euchresta-flavanone A <sup>c</sup>                         | 2 | 3', 8 | 6.62 | 2    | 2    | >128 | 2   | 0.28 | <i>Azadirachta indica, Euchresta formosana, Sophora species, Macaranga pleiostemona, yellow lupin</i> <sup>[78,212-215]</sup>                                                                                                                                    |
| Sophora-flavanone C <sup>c</sup>                           | 2 | 8, 8  | 6.13 | 2    | 2    | >128 | 1   | 0.16 | <i>Drynaria fortune, Sophora tomentosa, Echinosophora koreensis</i> <sup>[173,216,217]</sup>                                                                                                                                                                     |
| Leachianone G <sup>c</sup>                                 | 1 | 8     | 4.28 | 32   | 32   | >128 | 4   | 0.53 | <i>Podocarpium podocarpum, Desmodium caudatum, Desmodium caudatum, Cudrania tricuspidata, Sophora flavescens, Lespedeza</i>                                                                                                                                      |

|                                    |   |           |      |      |      |      |      |      |                                                                                                                                      |
|------------------------------------|---|-----------|------|------|------|------|------|------|--------------------------------------------------------------------------------------------------------------------------------------|
|                                    |   |           |      |      |      |      |      |      | <i>cyrtobotrya, Morua alba, Sophora leachiana</i> <sup>[218-222]</sup>                                                               |
| Licoflavanone <sup>c</sup>         | 1 | 3'        | 4.71 | 32   | 32   | >128 | 4    | 0.53 | <i>Glycyrrhiza glabra</i> <sup>[223]</sup>                                                                                           |
| Sophoranone <sup>c</sup>           | 3 | 3', 5', 8 | 8.24 | >128 | >128 | >128 | 4    | 0.53 | <i>Sophora tonkinensis, Sophora subprostrata</i> <sup>[187,224,225]</sup>                                                            |
| <b>Chalcone</b>                    |   |           |      |      |      |      |      |      |                                                                                                                                      |
| Isobavachalcone <sup>d</sup>       | 1 | 5'        | 4.81 | 4    | 4    | >128 | 0.06 | 0.04 | <i>Dorstenia barteri</i> <sup>[73,76,226-228]</sup>                                                                                  |
| Xanthohumol <sup>d</sup>           | 1 | 5'        | 4.80 | 4    | 4    | >128 | 0.12 | 0.06 | <i>Sophora flavescens, Humulus lupulus</i> <sup>[229]</sup>                                                                          |
| 4-Hydroxy-derricin <sup>c</sup>    | 1 | 5'        | 4.88 | 2    | 2    | >128 | 0.5  | 0.09 | <i>Angelica keiskei, Bifidobacterium dolescentis</i> <sup>[230,231]</sup>                                                            |
| Desmethyl-xanthohumol <sup>c</sup> | 1 | 3'        | 4.73 | 16   | 16   | >128 | 2    | 0.28 | <i>Humulus lupulus</i> <sup>[232-235]</sup>                                                                                          |
| Kanzonol C <sup>c</sup>            | 2 | 5, 5'     | 7.06 | 4    | 4    | >128 | 0.25 | 0.06 | <i>Glycyrrhiza inflata, Dorstenia barteri, Dorstenia turbinata, Glycyrrhiza eurycarpa</i> <sup>[43,236,237]</sup>                    |
| Licochalcone A <sup>d</sup>        | 1 | 3         | 4.85 | 4    | 4    | >128 | 0.5  | 0.09 | <i>Glycyrrhiza glabra</i> <sup>[53]</sup>                                                                                            |
| Licochalcone C <sup>d</sup>        | 1 | 5         | 4.91 | 4    | 4    | >128 | 0.5  | 0.09 | <i>Glycyrrhiza uralensis, Glycyrrhiza radix, Glycyrrhiza inflata, Glycyrrhiza glabra</i> <sup>[178,238,239]</sup>                    |
| Licochalcone D <sup>d</sup>        | 1 | 3'        | 4.65 | 16   | 32   | >128 | 8    | 1.03 | <i>Glycyrrhiza inflata</i> <sup>[240]</sup>                                                                                          |
| Licochalcone E <sup>d</sup>        | 1 | 3         | 4.75 | 4    | 4    | >128 | 0.12 | 0.06 | <i>Glycyrrhiza inflata</i> <sup>[241]</sup>                                                                                          |
| Xanthoangelol <sup>c</sup>         | 2 | 5', 5'    | 6.66 | 32   | >128 | 128  | >8   | 2.03 | <i>Angelica keiskei, Amorpha fruticosa, Psoralea corylifolia, Lespedeza cyrtobotrya, Artocarpus nobilis</i> <sup>[227,242,243]</sup> |
| <b>Xanthones</b>                   |   |           |      |      |      |      |      |      |                                                                                                                                      |
| $\alpha$ -Mangostin <sup>d</sup>   | 2 | 2, 8      | 6.32 | 1    | 1    | >128 | 0.06 | 0.04 | <i>Cratoxylum cochinchinense, Garcinia travancorica, Garcinia mangostana,</i>                                                        |

|                                                          |   |      |      |      |      |      |   |      |                                                                                                                                                                                                                                                                                                                                                            |
|----------------------------------------------------------|---|------|------|------|------|------|---|------|------------------------------------------------------------------------------------------------------------------------------------------------------------------------------------------------------------------------------------------------------------------------------------------------------------------------------------------------------------|
|                                                          |   |      |      |      |      |      |   |      | <i>Calphyllum tetrapterum, Garcinia tetrandra, Mangifera indica, Inula viscosa, Garcinia cowa, Garcinia fusca, Garcinia iowar, Garcinia oblongifolia, Tetranula laeviceps, Garcinia pedunculata, Comastoma pedunculatum, Cratoxylum arborescens, Garcinia hombroniana, Calophyllum brasiliense, Mesua ferrea, Mesua congestiflora</i> <sup>[244-260]</sup> |
| $\gamma$ -Mangostin <sup>c</sup>                         | 1 | 2    | 6.05 | 2    | 1    | >128 | 8 | 1.03 | <i>Garcinia travancorica, Garcinia angostana, Hypericum perforatum, Garcinia esculenta, Garcinia cowa, Cratoxylum cochinchinense, Garcinia xipshuanbannaensis, Garcinia costata, Cratoxylum formosum, Hypericum androsaemum</i> <sup>[253,261-268]</sup>                                                                                                   |
| 1,3,7-Trihydroxy-2-prenylxanthone <sup>c</sup>           | 1 | 2    | 4.52 | 16   | 16   | >128 | 2 | 0.28 | <i>Cudrania cochinchinensis</i> <sup>[266]</sup>                                                                                                                                                                                                                                                                                                           |
| 1,4,5,6-Tetrahydroxy-7,8-diprenyl-xanthone <sup>c</sup>  | 2 | 7, 8 | 6.07 | >128 | >128 | >128 | 8 | 1.03 | <i>Garcinia xanthochymus</i> <sup>[269]</sup>                                                                                                                                                                                                                                                                                                              |
| 1,4,5,6-Tetrahydroxy-7-prenyl-xanthone <sup>c</sup>      | 1 | 7    | 4.29 | 128  | 16   | >128 | 8 | 1.03 | <i>Garcinia bracteata, Garcinia xanthochymus</i> <sup>[269-271]</sup>                                                                                                                                                                                                                                                                                      |
| 1,4,6-Trihydroxy-5-methoxy-7-prenylxanthone <sup>c</sup> | 1 | 7    | 4.56 | 128  | 128  | >128 | 8 | 1.03 | <i>Garcinia xanthochymus, Morus tropurpurea, Comastoma pulmonarium, Garcinia oblongifolia,</i>                                                                                                                                                                                                                                                             |

|                                       |   |         |      |      |      |      |   |      |                                                                                                                                                                                                                                                                                                                 |
|---------------------------------------|---|---------|------|------|------|------|---|------|-----------------------------------------------------------------------------------------------------------------------------------------------------------------------------------------------------------------------------------------------------------------------------------------------------------------|
| 8-Deoxygartanin <sup>c</sup>          | 2 | 2, 4    | 6.33 | >128 | >128 | >128 | 8 | 1.03 | <i>Garcinia bracteata</i> , <i>Garcinia dulcis</i> <sup>[270,272-276]</sup>                                                                                                                                                                                                                                     |
| 9-Hydroxy-calabaxanthone <sup>c</sup> | 2 | 2, 8    | 5.75 | 8    | 2    | >128 | 4 | 0.53 | <i>Garcinia mangostin</i> , <i>Garcinia multiflora</i> , <i>Garcinia cowa</i> <sup>[282-288]</sup>                                                                                                                                                                                                              |
| Garcinia-xanthone E <sup>c</sup>      | 3 | 7, 7, 8 | 7.65 | >128 | >128 | >128 | 8 | 1.03 | <i>Garcinia subelliptica</i> <sup>[289]</sup>                                                                                                                                                                                                                                                                   |
| Gartanin <sup>c</sup>                 | 2 | 2, 4    | 6.07 | >128 | 128  | >128 | 8 | 1.03 | <i>Garcinia mangostana</i> , <i>Garcinia bracteata</i> , <i>Garcinia propinqua</i> , <i>Garcinia achachairu</i> , <i>Tetragonula laeviceps</i> , <i>Tetrigona melanoleuca</i> , <i>Garcinia nobilis</i> , <i>Garcinia staudtii</i> , <i>Garcinia dulcis</i> , <i>Maclura tinctoria</i> <sup>[157,290-297]</sup> |
| Isogarcinia-xanthone E <sup>c</sup>   | 3 | 4, 7, 8 | 8.06 | 16   | 2    | >128 | 8 | 1.03 | <i>Calophyllum elatum</i> <sup>[294]</sup>                                                                                                                                                                                                                                                                      |
| Nujiangxanthone I <sup>e</sup>        | 3 | 4, 7, 8 | 6.71 | 64   | 16   | >128 | 8 | 1.03 | <i>Garcinia nujiangensis</i> <sup>[298]</sup>                                                                                                                                                                                                                                                                   |
| Nujiangxanthone D <sup>e</sup>        | 2 | 4, 8    | 5.82 | 1    | 2    | >128 | 8 | 1.03 | <i>Garcinia nujiangensis</i> <sup>[298]</sup>                                                                                                                                                                                                                                                                   |
| Isojacareubin <sup>e</sup>            | 1 | 4       | 3.69 | 16   | 16   | >128 | 8 | 1.03 | <i>Garcinia nujiangensis</i> , <i>Hypericum stellatum</i> , <i>Garcinia fusca</i> , <i>Garcinia livingstonei</i> , <i>Hypericum japonicum</i> , <i>Hypericum roeperanum</i> , <i>Garcinia schomburgkiana</i> , <i>Garcinia cowa</i> , <i>Garcinia xipshuanbannaensis</i> <sup>[80,298-303]</sup>                |
| Nujiangxanthone                       | 3 | 4, 7, 8 | 6.98 | 4    | 8    | >128 | 8 | 1.03 | <i>Garcinia nujiangensis</i> <sup>[298]</sup>                                                                                                                                                                                                                                                                   |

| N <sup>e</sup>                    |   |         |      |      |      |      |   |      |                                                                                                                                                                                                                                                                                                                                                                                                                                                                                                                                                                                                                                                                                                                                          |
|-----------------------------------|---|---------|------|------|------|------|---|------|------------------------------------------------------------------------------------------------------------------------------------------------------------------------------------------------------------------------------------------------------------------------------------------------------------------------------------------------------------------------------------------------------------------------------------------------------------------------------------------------------------------------------------------------------------------------------------------------------------------------------------------------------------------------------------------------------------------------------------------|
| Buchanaxanthone <sup>e</sup>      | 0 | —       | 2.81 | 8    | 16   | >128 | 8 | 1.03 | <i>Garcinia nujiangensis</i> , <i>Garcinia tetralata</i> <sup>[298,304]</sup>                                                                                                                                                                                                                                                                                                                                                                                                                                                                                                                                                                                                                                                            |
| 6-Deoxyisojacareubin <sup>e</sup> | 1 | 4       | 4.19 | >128 | >128 | >128 | 8 | 1.03 | <i>Garcinia nujiangensis</i> , <i>Clusia burlemarxii</i> , <i>Garcinia nervosa</i> , <i>Hypericum laricifolium</i> , <i>Garcinia livingstonei</i> , <i>Allanblackia gabonensis</i> , <i>Vismia laurentii</i> , <i>Garcinia merguensis</i> , <i>Hypericum japonicum</i> , <i>Cudrania tricuspidata</i> , <i>Anaxagorea luzonensis</i> , <i>Cudrania tricuspidata</i> , <i>Allanblackia floribunda</i> , <i>Garcinia bracteata</i> , <i>Garcinia speciosa</i> , <i>Garcinia celebica</i> , <i>Arenaria serpyllifolia</i> , <i>Garcinia amplexicaulis</i> , <i>Calophyllum thorelii</i> , <i>Garcinia xanthochymus</i> , <i>Vismia guineensis</i> , <i>Garcinia nigrolineata</i> , <i>Hypericum wightianum</i> <sup>[281,298,305-312]</sup> |
| Nujiangxanthone A <sup>e</sup>    | 3 | 4, 7, 8 | 7.84 | 2    | 8    | >128 | 8 | 1.03 | <i>Garcinia nujiangensis</i> <sup>[298]</sup>                                                                                                                                                                                                                                                                                                                                                                                                                                                                                                                                                                                                                                                                                            |
| Nujiangxanthone B <sup>e</sup>    | 3 | 4, 7, 8 | 8.11 | 64   | 16   | >128 | 8 | 1.03 | <i>Garcinia nujiangensis</i> <sup>[298]</sup>                                                                                                                                                                                                                                                                                                                                                                                                                                                                                                                                                                                                                                                                                            |

<sup>a</sup> MIC ( $\mu\text{g mL}^{-1}$ ) of colistin against *E. coli* B2 under  $8 \mu\text{g mL}^{-1}$  flavonoids. <sup>b</sup> FICI of colistin and flavonoids ( $8 \mu\text{g mL}^{-1}$ ) against *E. coli* B2 were shown. <sup>c</sup> Compounds were purchased from Shanghai Universal Biotech Company with a purity of  $\geq 95\%$  (Shanghai, China). <sup>d</sup> Compounds were purchased from Chengdu Biopurify Phytochemicals Ltd. with a purity of  $\geq 95\%$  (Chengdu, China). <sup>e</sup> Compounds were donated by Professor Hua Huiming of Shenyang Pharmaceutical University (Shenyang, China), which were isolated from the twigs and leaves of *Garcinia nujiangensis* with a purity of  $\geq 95\%$ <sup>[293]</sup>. <sup>f</sup> The values of LogP were calculated using software Molinspiration.



**Table S3.** SAR-based molecular signatures of prenylated flavonoids and antimicrobial potency against Gram-positive bacteria.

| Lead compound       | Prenylation |          | MIC ( $\mu\text{g mL}^{-1}$ ) |           |                              |
|---------------------|-------------|----------|-------------------------------|-----------|------------------------------|
|                     | n           | Position | MSSA<br>ATCC 29213            | MRSA T144 | VRE <sub>fm</sub> CAU<br>369 |
| Mulberrin           | 2           | 3, 8     | 1                             | 1         | 2                            |
| Lupalbigenin        | 2           | 6, 3'    | 1                             | 1         | 2                            |
| Glabrol             | 2           | 8, 3'    | 1                             | 1         | 2                            |
| Isobavachalcone     | 1           | 5'       | 4                             | 4         | 1                            |
| $\alpha$ -Mangostin | 2           | 2, 8     | 1                             | 1         | 2                            |

**Table S4.** Synergy between lead compounds and colistin against Gram-negative bacteria.

| Selected compound   | Prenylation |          | MIC ( $\mu\text{g mL}^{-1}$ )      |                            |                              |                      |      | Flavonoids <sup>a</sup> | FICI <sup>b</sup> |
|---------------------|-------------|----------|------------------------------------|----------------------------|------------------------------|----------------------|------|-------------------------|-------------------|
|                     | n           | position | <i>K. pneumoniae</i><br>ATCC 43816 | <i>A. baumannii</i><br>7-2 | <i>P. aeruginosa</i><br>PAO1 | <i>E. coli</i><br>B2 |      |                         |                   |
| Mulberrin           | 2           | 3, 8     | >128                               | >128                       | >128                         | >128                 | 0.25 | 0.06                    |                   |
| Lupalbigenin        | 2           | 6, 3'    | >128                               | >128                       | >128                         | >128                 | 0.50 | 0.09                    |                   |
| Glabrol             | 2           | 8, 3'    | >128                               | >128                       | >128                         | >128                 | 0.12 | 0.05                    |                   |
| Isobavachalcone     | 1           | 5'       | >128                               | >128                       | >128                         | >128                 | 0.06 | 0.04                    |                   |
| $\alpha$ -Mangostin | 2           | 2, 8     | >128                               | >128                       | >128                         | >128                 | 0.06 | 0.04                    |                   |

<sup>a</sup> The MIC of colistin under  $4 \mu\text{g mL}^{-1}$  of flavonoids against *E. coli* B2.

<sup>b</sup> The FICI of flavonoids and colistin under  $4 \mu\text{g mL}^{-1}$  of flavonoids against *E. coli* B2.

**Table S5.** Antibacterial activities of AMG/IBC against 23 clinical MRSA isolates.

| Clinical MRSA isolates | MIC ( $\mu\text{g/mL}$ ) |     |
|------------------------|--------------------------|-----|
|                        | AMG                      | IBC |
| Human Origin (n = 7)   |                          |     |
| 03044                  | 0.5                      | 4   |
| 65322                  | 0.5                      | 4   |
| 65339                  | 0.5                      | 4   |
| 65543                  | 0.5                      | 4   |
| 6559                   | 0.5                      | 4   |
| 70675                  | 0.5                      | 1   |
| 70678                  | 0.5                      | 4   |
| Animal Origin (n = 16) |                          |     |
| 1518                   | 0.5                      | 4   |
| 1530                   | 0.5                      | 4   |
| AB18                   | 0.5                      | 4   |
| EF-2                   | 0.5                      | 4   |
| HN3                    | 0.5                      | 4   |
| L26                    | 0.5                      | 4   |
| M7                     | 0.5                      | 8   |
| NB61                   | 0.5                      | 4   |
| NX-75                  | 0.5                      | 4   |
| SB14                   | 0.5                      | 8   |
| SB-27                  | 0.5                      | 4   |
| T144                   | 0.5                      | 4   |
| T182                   | 0.5                      | 4   |
| T50                    | 0.5                      | 4   |
| T52                    | 0.5                      | 4   |
| ZS7                    | 0.5                      | 4   |
| MIC <sub>50</sub>      | 0.5                      | 4   |
| MIC <sub>90</sub>      | 0.5                      | 4   |

**Table S6.** Antibacterial activities of AMG/IBC against 50 clinical VRE isolates.

| Clinical VRE <sub>fm</sub> isolates | MIC ( $\mu\text{g mL}^{-1}$ ) |     |            |
|-------------------------------------|-------------------------------|-----|------------|
|                                     | AMG                           | IBC | Vancomycin |
| CAU379                              | 0.5                           | 8   | > 128      |
| CAU380                              | 0.5                           | 4   | > 128      |
| CAU381                              | 0.5                           | 8   | > 128      |
| CAU382                              | 0.5                           | 8   | > 128      |
| CAU383                              | 0.5                           | 4   | > 128      |
| CAU384                              | 0.5                           | 8   | > 128      |
| CAU385                              | 0.5                           | 2   | > 128      |
| CAU386                              | 0.5                           | 4   | > 128      |
| CAU387                              | 0.5                           | 2   | > 128      |
| CAU388                              | 0.5                           | 8   | > 128      |
| CAU389                              | 0.5                           | 4   | > 128      |
| CAU393                              | 0.5                           | 8   | > 128      |
| CAU394                              | 0.5                           | 2   | > 128      |
| CAU399                              | 0.5                           | 2   | > 128      |
| CAU401                              | 1                             | 2   | > 128      |
| CAU402                              | 1                             | 2   | > 128      |
| CAU403                              | 1                             | 8   | > 128      |
| CAU404                              | 1                             | 4   | > 128      |
| CAU405                              | 0.25                          | 4   | > 128      |
| CAU406                              | 0.5                           | 8   | > 128      |
| CAU407                              | 0.5                           | 4   | > 128      |
| CAU408                              | 0.25                          | 4   | > 128      |
| CAU409                              | 0.25                          | 8   | > 128      |
| CAU410                              | 0.5                           | 4   | > 128      |
| CAU411                              | 0.25                          | 8   | > 128      |
| CAU412                              | 0.5                           | 8   | > 128      |
| CAU414                              | 0.5                           | 8   | > 128      |

continued

**Table S6** continued

|        |     |   |       |
|--------|-----|---|-------|
| CAU415 | 0.5 | 8 | > 128 |
| CAU416 | 0.5 | 8 | > 128 |
| CAU417 | 0.5 | 8 | > 128 |
| CAU421 | 0.5 | 4 | > 128 |
| CAU422 | 0.5 | 4 | > 128 |
| CAU424 | 0.5 | 8 | > 128 |
| CAU431 | 0.5 | 8 | > 128 |

|                   |      |   |       |
|-------------------|------|---|-------|
| CAU433            | 0.5  | 8 | > 128 |
| CAU434            | 0.25 | 4 | > 128 |
| CAU436            | 0.5  | 8 | > 128 |
| CAU438            | 0.5  | 8 | > 128 |
| CAU442            | 0.5  | 4 | > 128 |
| CAU443            | 0.5  | 8 | > 128 |
| CAU445            | 0.5  | 4 | > 128 |
| CAU446            | 0.5  | 8 | > 128 |
| CAU447            | 0.5  | 8 | > 128 |
| CAU450            | 0.5  | 8 | > 128 |
| CAU454            | 0.5  | 8 | > 128 |
| CAU455            | 0.5  | 8 | > 128 |
| CAU456            | 0.5  | 8 | > 128 |
| CAU453            | 0.5  | 8 | > 128 |
| CAU457            | 0.5  | 8 | > 128 |
| CAU458            | 0.5  | 8 | > 128 |
| MIC <sub>50</sub> | 0.5  | 8 | > 128 |
| MIC <sub>90</sub> | 0.5  | 8 | > 128 |

**Table S7.** The MIC of AMG/IBC against different Gram-negative bacteria.

| Strains                                       | Description           | MIC ( $\mu\text{g mL}^{-1}$ ) |       |          |
|-----------------------------------------------|-----------------------|-------------------------------|-------|----------|
|                                               |                       | AMG                           | IBC   | Colistin |
| <i>K. pneumoniae</i> ATCC 43816               | Wild type             | >128                          | >128  | 16       |
| <i>K. pneumoniae</i> ATCC 43816 $\Delta waaC$ | <i>waaC</i> deficient | 4                             | 4     | 0.25     |
| <i>A. baumannii</i> 7-2                       | Wild type             | >128                          | >128  | 0.0625   |
| <i>A. baumannii</i> 7-2 LPS-                  | LPS deficient         | 0.125                         | 0.125 | >32      |

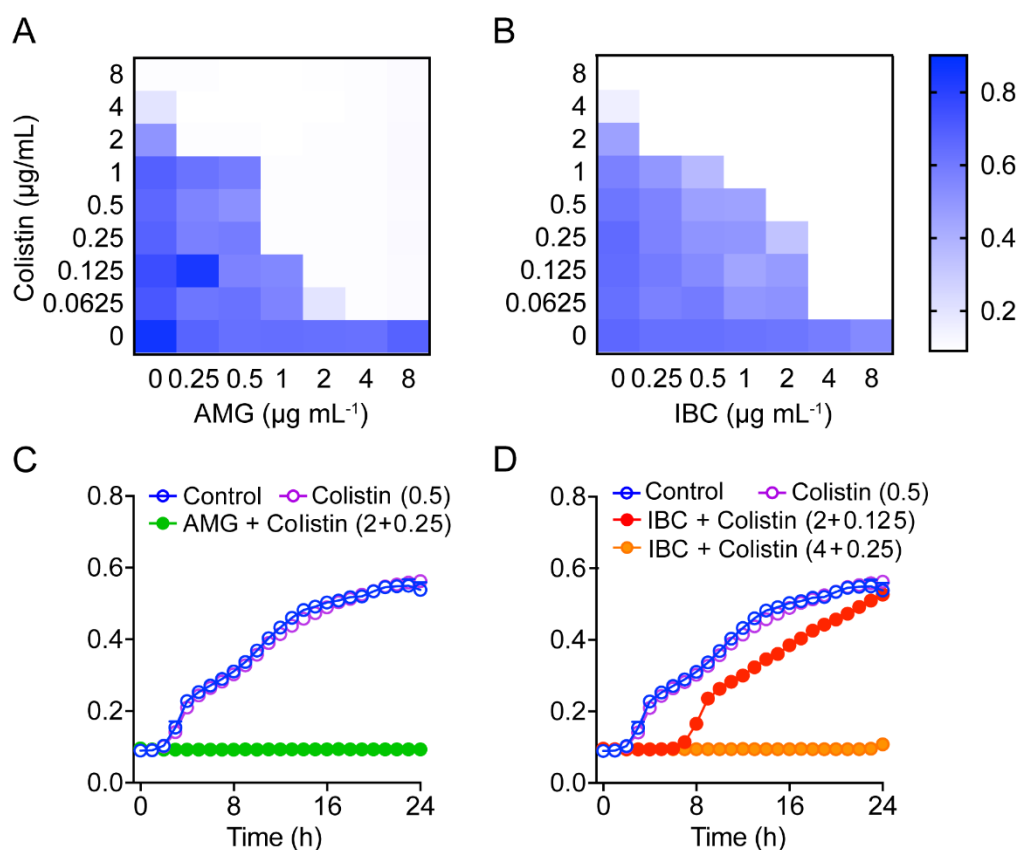

**Figure S1.** Combinations of AMG/IBC with colistin are effective against *E. coli* B2.

A, B) Checkerboard microdilution assays showed the dose-dependent potentiation of colistin by AMG (A) or IBC (B) against *mcr-1* positive *E. coli* B2. Dark-blue regions represent higher cell density and lower inhibition rate of combinational treatment.

Data represent two biological replicates,  $n = 3$ .

C, D) Kinetic analysis of AMG (C) or IBC (D) and colistin at different concentrations in *mcr-1* positive *E. coli* B2. Optical density (OD) at 600 nm was monitored once every hour for 24 h. Experiments were performed as three biologically independent experiments, and the mean  $\pm$  s.d. is shown,  $n = 3$ .

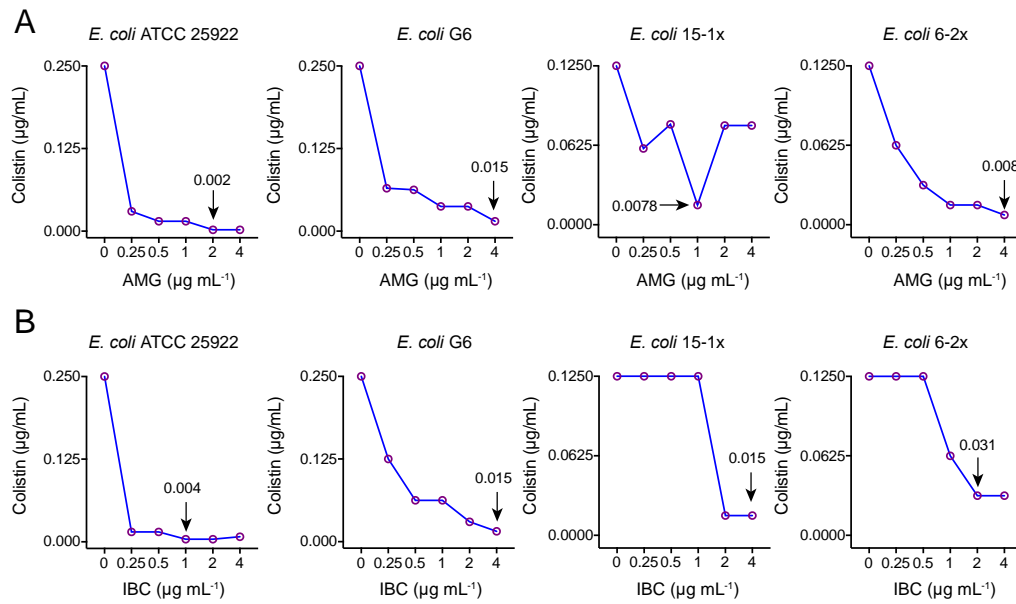

**Figure S2.** The synergy of AMG/IBC with colistin against colistin-sensitive *E. coli* isolates.

Sub-MIC levels of AMG (A) or IBC (B) enhanced the activity of colistin against four colistin-sensitive (*E. coli* ATCC25922, *E. coli* G6, *E. coli* 15-1x and *E. coli* 6-2x) by checkerboard microdilution assay. Experiments were performed as three biologically independent experiments,  $n = 3$ .



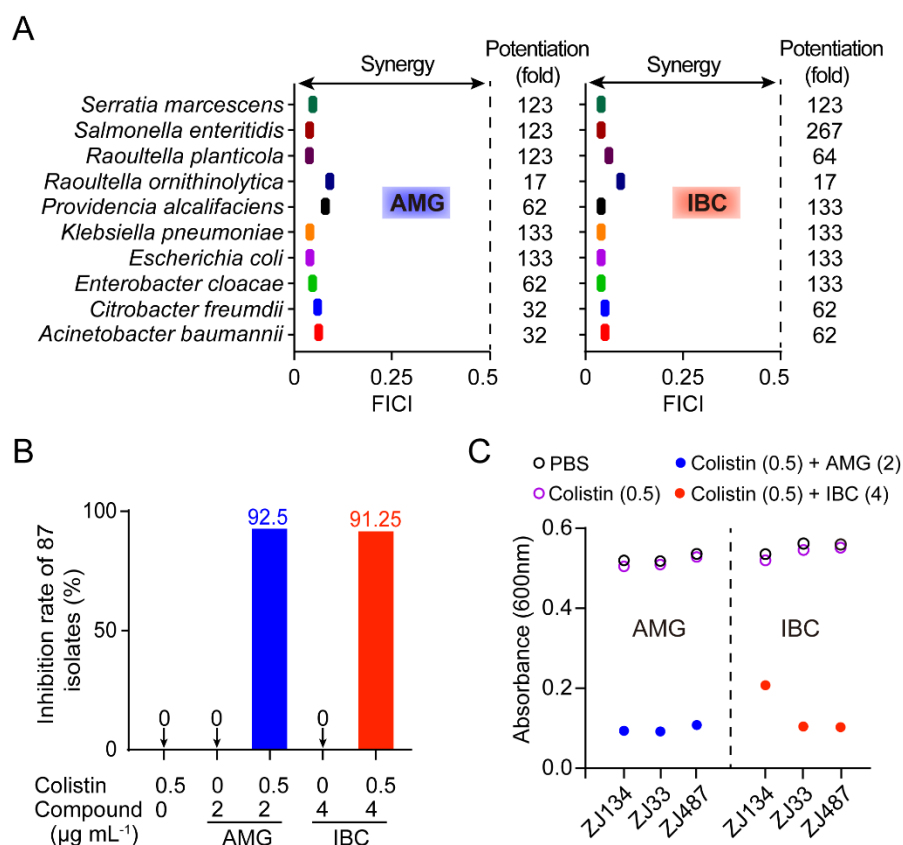

**Figure S3.** AMG or IBC restored the activity of colistin against colistin-resistant Gram-negative bacteria.

A) FICI values of colistin and AMG or IBC against 10 species of Gram-negative bacteria harboring *mcr-1*. The potentiation (fold) referred to the change in MIC of colistin under  $8 \mu\text{g mL}^{-1}$  flavonoids against different isolates. Data represent two biological replicates,  $n = 3$ .

B) Combinations of AMG ( $2 \mu\text{g mL}^{-1}$ ) or IBC ( $4 \mu\text{g mL}^{-1}$ ) with colistin ( $0.5 \mu\text{g mL}^{-1}$ ) against 87 *E. coli* isolates carrying *mcr-1*.<sup>[2-3]</sup> Growth inhibition was defined as no visible growth of bacteria treated with the combinations after incubation at  $37^\circ\text{C}$  for 18 h. At least 72 of the 87 *mcr-1 E. coli* isolates are resistant to multiple classes of antibacterial agents except colistin.<sup>[3]</sup>

C) Combinations of AMG ( $2 \mu\text{g mL}^{-1}$ ) or IBC ( $4 \mu\text{g mL}^{-1}$ ) with colistin ( $0.5 \mu\text{g mL}^{-1}$ ) against 3 multi-drug resistant *E. coli* isolates carrying *mcr-1*.  $\text{OD}_{600 \text{ nm}}$  of bacteria suspension treated with the combinations after incubation at  $37^\circ\text{C}$  for 18 h were determined. PBS was used as negative control. *E. coli* ZJ134, *E. coli* ZJ33 and *E. coli* ZJ487 carry 29, 31 and 20 antibiotic resistant genes, respectively.<sup>[3]</sup>

Experiments were performed as three biologically independent experiments,  $n = 3$ .

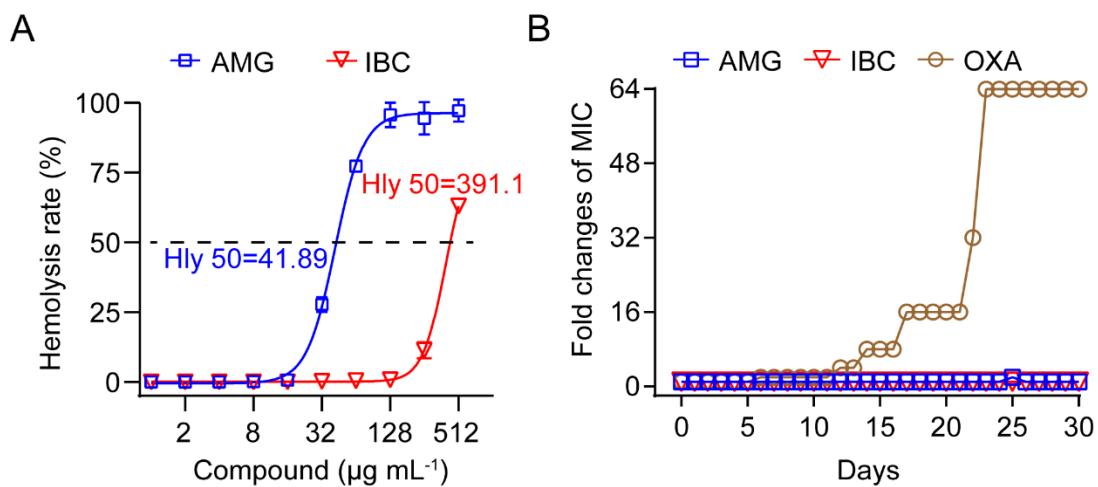

**Figure S4.** Safety evaluation and resistance development of AMG/IBC.

A) Hemolytic activity of AMG or IBC at different concentrations (0 - 512  $\mu\text{g mL}^{-1}$ ) to the red blood cells of sheep. AMG had low hemolysis (25.86%) at 32  $\mu\text{g mL}^{-1}$ , while IBC showed no hemolysis (0.73%) even at high concentrations of 128  $\mu\text{g mL}^{-1}$ .

Experiments were performed as three biologically independent experiments. Data presented as mean  $\pm$  s.d, n = 3.

B) No resistance to AMG or IBC occurred in 30-day serial passage. *S. aureus* ATCC 29213 was passaged daily in sub-inhibitory concentrations of AMG, IBC or oxacillin (OXA). OXA was used as positive control.

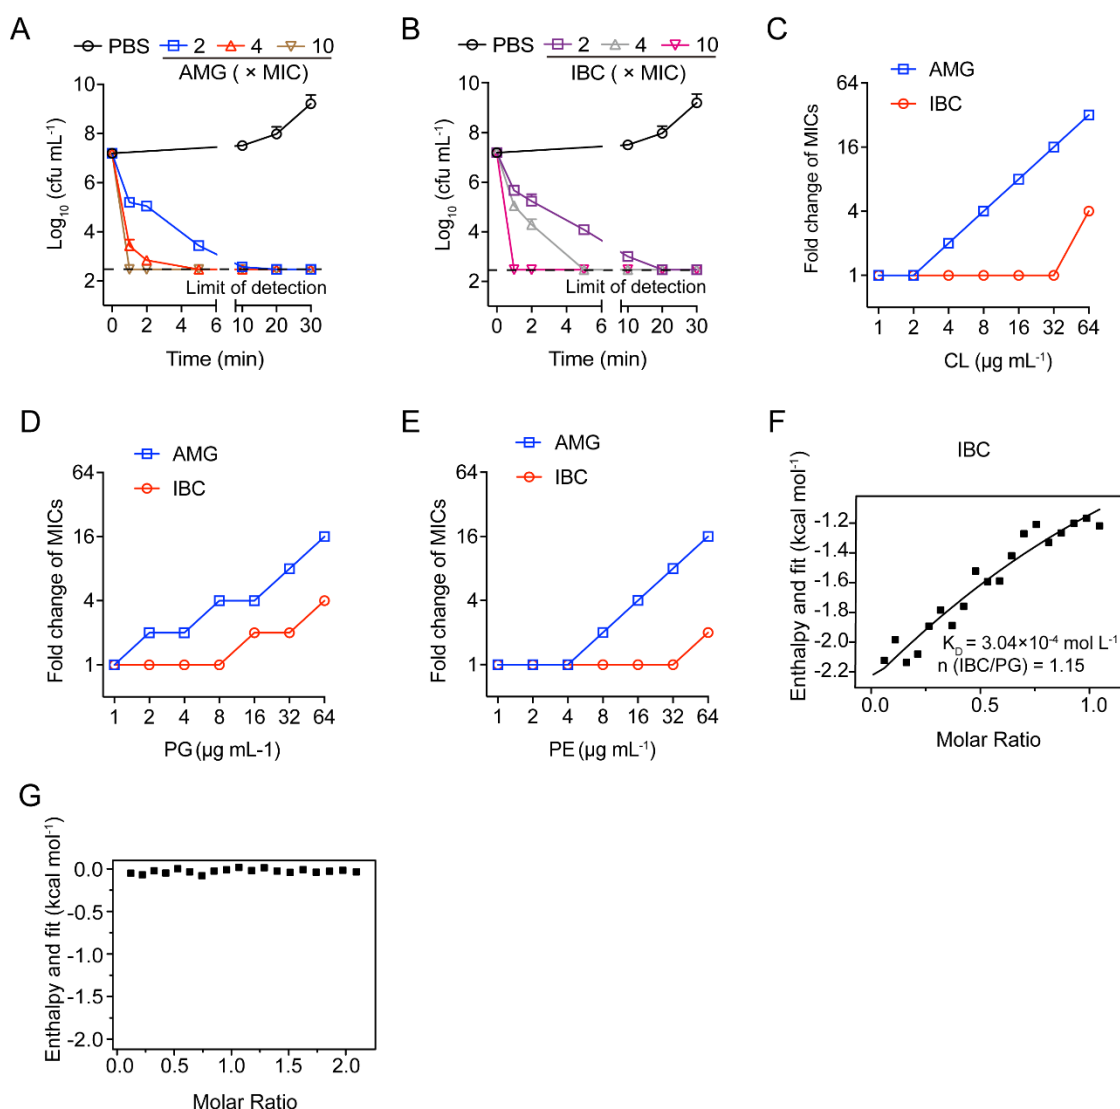

**Figure S5.** Antibacterial activities of AMG/BC through targeting phospholipids in bacterial membrane.

A, B) Time-killing curves of AMG or IBC against *S. aureus* ATCC 29213 at exponential phase at 37 °C. *S. aureus* cells were treated with 2, 4 and 10 × MIC of AMG (A), IBC (B) for 30 min, and the number of viable cells were determined at different time points.

C, D, E) Exogenous addition of CL (C), PG (D) and PE (E) decreased the antibacterial activity of AMG or IBC against *S. aureus* ATCC 29213 by chequerboard microdilution assays. The concentrations of lipids was in the range of 0 to 128  $\mu\text{g mL}^{-1}$ . CL, PE and PG represent cardiolipin, phosphatidylethanolamine and phosphatidylglycerol, respectively.

F) ITC analysis of the interaction between PG and IBC. Thermodynamic parameters were calculated, including equilibrium dissociation constant ( $K_D = 3.04 \times 10^{-4} \text{ mol L}^{-1}$ ), number of binding sites ( $n = 1.15$ ), molar binding enthalpy ( $\Delta H = -21.57 \text{ kJ mol}^{-1}$ ) and molar binding entropy ( $\Delta S = 5.87 \text{ J mol}^{-1} \text{ K}^{-1}$ ).

G) ITC analysis of the interaction between PG and buffer (20 mmol L<sup>-1</sup> HEPES, pH 7.0).

Experiments in A and B were performed as three biologically independent experiments, data represent as mean  $\pm$  s.d,  $n = 3$ . Experiments in C-G were performed as two biologically independent experiments.

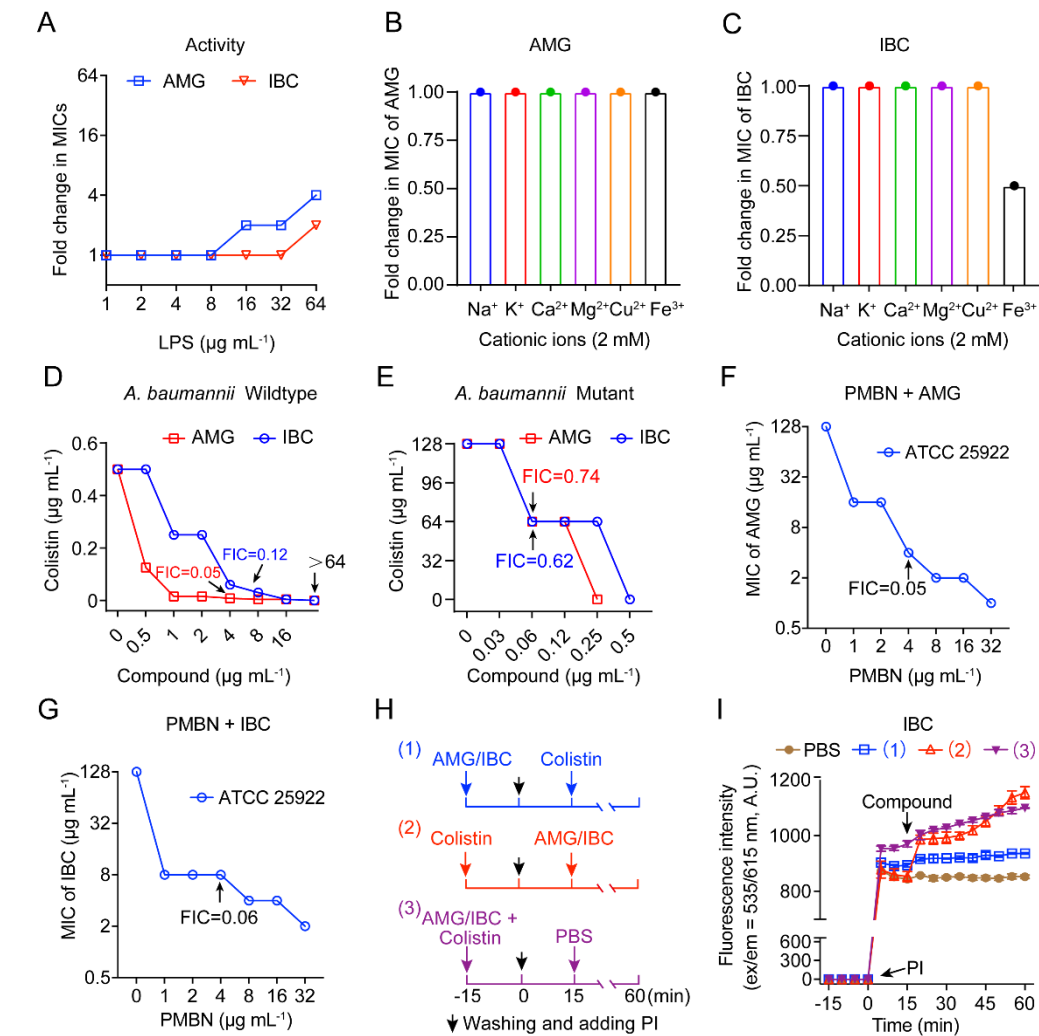

**Figure S6.** AMG/IBC exerts antibacterial effects through targeting membranes in Gram-negative bacteria.

A) The change in MIC of AMG or IBC against *S. aureus* ATCC 29213 in the presence of lipopolysaccharide (LPS) of the outer membrane. High levels of LPS had neglectable influence on the activity of either AMG or IBC.

B, C) Effects of divalent cations on the MICs of AMG (B) and IBC (C). Divalent cations had neglectable influence on the antibacterial activity of either AMG or IBC against *S. aureus* ATCC 29213.

D, E) Synergy of AMG and IBC with colistin for *A. baumannii* wildtype (D) and mutant (LPS-deficient) isolates (E). No synergy was observed after the LPS was deficient.

F, G) Synergy of the colistin analogue, polymyxin B nonapeptide (PMBN), with AMG (F) or IBC (G) against *E. coli* ATCC 25922 by checkerboard microdilution

assay.

H) The schedule of experimental design. *E. coli* B2 was incubated with different antibacterial drugs at 37 °C for 15 min. After washing for three times, PI was added and the fluorescence was determined for 15 min. Then the other drugs were added. The fluorescence was measured with the excitation wavelength at 535 nm and emission wavelength at 615 nm.

I) The permeability dynamics of inner membrane in *E. coli* B2, under the treatments of IBC, and colistin and both thereof. The concentrations of IBC and colistin were 4 and 0.25  $\mu\text{g mL}^{-1}$ , respectively.

Experiments in A-G were performed as two biologically independent experiments,  $n = 3$ . Experiments in I were performed as three biologically independent experiments, data presented as mean  $\pm$  s.d,  $n = 3$ .

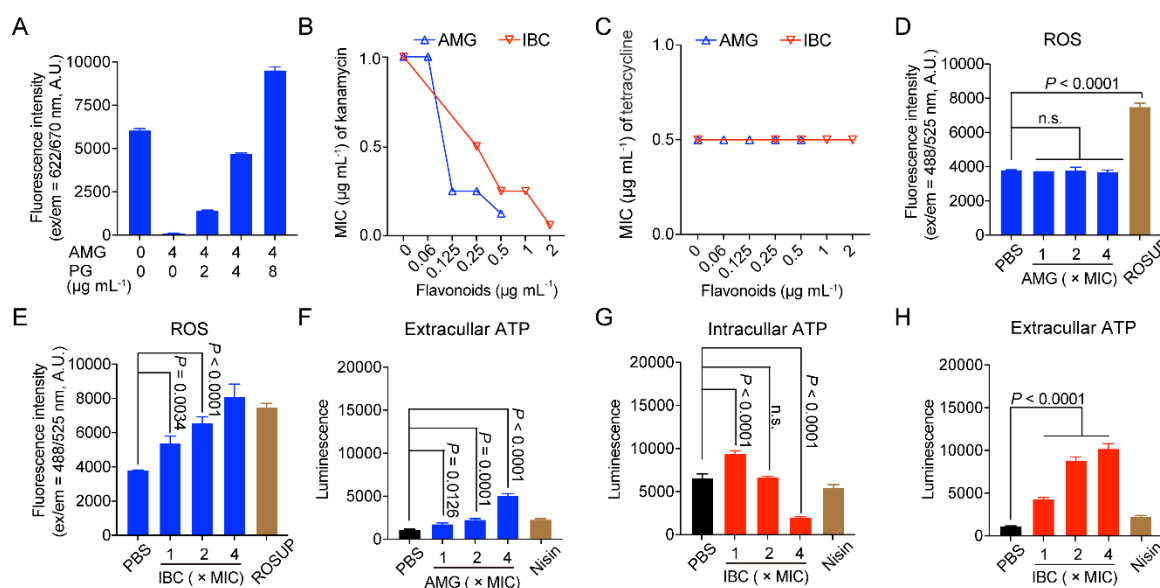

**Figure S7.** Mechanism of AMG/IBC against Gram-positive bacteria.

A) Competition kinetics between DiSC<sub>3</sub> (5) (1 μmol mL<sup>-1</sup>), POPG (0-8 μg mL<sup>-1</sup>) and AMG (4 μg mL<sup>-1</sup>). The fluorescence of DiSC<sub>3</sub> (5) was determined by Infinite M200 Microplate reader (Tecan), with excitation wavelength at 622 nm and emission wavelength at 670 nm.

B) The synergy of kanamycin in combination with either AMG or IBC against *S. aureus* ATCC 29213.

C) No synergy was observed between AMG/IBC and tetracycline against *S. aureus* ATCC 29213.

D-E) The effect of AMG (C) or IBC (D) on the ROS accumulation in *S. aureus* ATCC 29213 after treatment for 15 min. ROSUP was used as the positive control.

F) Increased levels of extracellular ATP in *S. aureus* ATCC 29213 after the treatment of AMG for 10 min.

G, H) Decrease levels of intracellular (G) and increased levels of extracellular (H) ATP in *S. aureus* ATCC 29213 after the treatment of IBC for 10 min.

Experiments in A, D-H were performed as three biologically independent experiments, data presented as mean ± s.d, n = 3. P-values in C-G were calculated using non-parametric one-way ANOVA. Experiments in B-C were performed as three biologically independent experiments, n = 3.





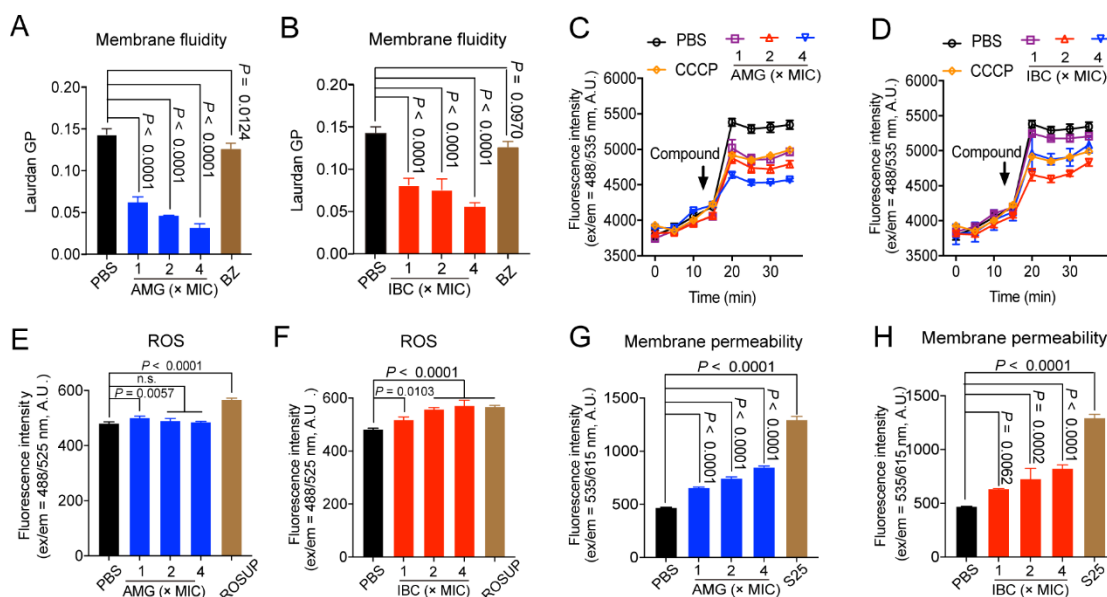

**Figure S8.** Mechanism of AMG or IBC against Gram-negative bacteria.

A, B) The membrane fluidity for *K. pneumoniae* ATCC 43816  $\Delta waaC$  after treatment of AMG (A) or IBC (B) was increased. 50 mmol L<sup>-1</sup> benzyl alcohol (BA) was used as the positive control.

C, D) Dissipated  $\Delta$ pH by AMG (C) or IBC (D) in *K. pneumoniae* ATCC 43816  $\Delta waaC$ . Exponential *K. pneumoniae* ATCC 43816  $\Delta waaC$  was incubated with pH fluorescence probe BCECF-AM. After washed for three times, different concentrations of AMG or IBC were added and the intracellular pH was determined by measuring the fluorescence intensity with the excitation/emission wavelength at 488 nm/535 nm.

E, F) The effect of AMG (E) or IBC (F) on the ROS accumulation in *K. pneumoniae* ATCC 43816  $\Delta waaC$ . ROSUP was used as the positive control.

G, H) Increased permeability of inner membrane for *K. pneumoniae* ATCC 43816  $\Delta waaC$  after treatment of AMG (G) or IBC (H) for 20 min. SLAP-S25 was used as the positive control.

Experiments in A-H were performed as three biologically independent experiments, data presented as mean  $\pm$  s.d, n = 3. P-values were calculated using non-parametric one-way ANOVA.

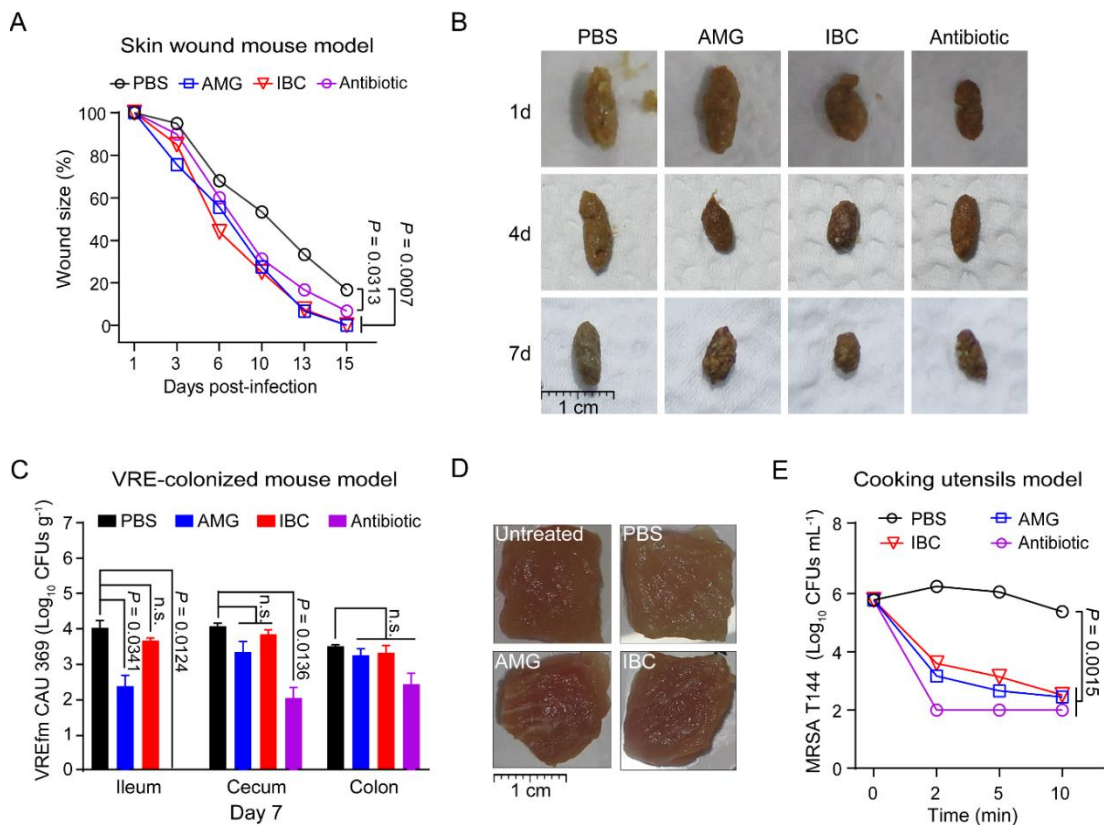

**Figure S9.** AMG and IBC exerted greatly antibacterial potential in four models.

A) Mouse skin wound infection models (n = 18 in each group). Skin wounds size reduced under the treatment of AMG (2 mg kg<sup>-1</sup>) and IBC (8 mg kg<sup>-1</sup>) on days 1, 3, 6, 10, 13 and 15 after injury in MRSA T144 (1.0 × 10<sup>7</sup> CFUs infection).

B) VRE-colonized mouse model. Representative photographs of fecal pellets on days 1, 4 and 7 under the treatment of AMG (5 mg kg<sup>-1</sup>) and IBC (20 mg kg<sup>-1</sup>). AMG and IBC reduced the symptoms of diarrhea in mice. Antibiotic (tiamulin, 5 mg kg<sup>-1</sup>) was used as a positive control.

C) VRE-colonized mouse model. AMG and IBC decreased the numbers of VRE<sub>fm</sub> CAU369 in ileum, cecum, and colon after treatment for 7 days. Antibiotic (tiamulin, 5 mg kg<sup>-1</sup>) was used as a positive control.

D) Food spoilage model. Representative photographs of morphological characteristics of meat under different treatments at 37 °C for 24 h. The concentrations of AMG and IBC were 2 mg kg<sup>-1</sup> and 4 mg kg<sup>-1</sup>, respectively.

E) Cooking utensils model. Plastic lunch boxes were contaminated with MRSA T144 (6.0 × 10<sup>6</sup> CFUs) for 30 min. After treatment of AMG (2 μg mL<sup>-1</sup>) or IBC (8 μg mL<sup>-1</sup>)

for 0, 2, 5, and 10 min, the bacteria number on the lunch boxes was calculated by the chromogenic agar plate.

Data presented as mean  $\pm$  s.d, n = 3. *P*-values were calculated using non-parametric one-way ANOVA.

## References

- [1] Y. Liu, S. Ding, R. Dietrich, E. Martlbauer, K. Zhu, *Angew. Chem. Int. Ed. Engl.* **2017**, *56*, 1486.
- [2] M. R. Song, Y. Liu, X. Y. Huang, S. Y. Ding, Y. Wang, J. Z. Shen, K. Zhu, *Nat. Microbiol.* **2020**, *5*, 1040.
- [3] Y. B. Shen, Z. W. Wu, W. Yang, Z Rong, H. W. Zhou, S. L. Wang, L. Lei, M. Li, J. C. Cai, J. Tyrrell, G. B. Tian, C. M. Wu, Q. J. Zhang, J. Z. Shen, T. R. Walsh, Z. Q. Shen, *mBio.* **2018**, *9*, e00943-18.
- [4] Z. Q. Yang, Q. L. Sun, S. Chen, S. Y. Ding, R. Zhang, K. Zhu, *Microb. Drug. Resist.* **2020**, Doi: 10.1089/mdr.2020.0225.
- [5] K. Zhu, S. Chen, T. Sysoeva, L. You, *PLoS Biol.* **2019**, *17*, e3000573.
- [6] E. T. Arung, K. Shimizu, R. Kondo, *Planta Med.* **2006**, *72*, 847.
- [7] E. T. Arung, K. Yoshikawa, K. Shimizu, R. Kondo, *Fitoterapia* **2010**, *81*, 120.
- [8] T. Zhao, G. Yan, S. Pan, H. Wang, A. Hou, *Chem. Biodivers.* **2009**, *6*, 2209.
- [9] L. Wang, Y. Yang, C. Liu, R. Chen, *J. Asian Nat. Prod. Res.* **2010**, *12*, 431.
- [10] K. Likhitwitayawuid, B. Sritularak, W. De-Eknamkul, *Planta Med.* **2000**, *66*, 275.
- [11] J. Sun, X. He, M. Zhao, L Li, C. Li, Y. Dong, *Molecules* **2014**, *19*, 13147.
- [12] Q. Lin, J. Yuan, Z. Ma, J. Liang, X. Zhai, I. Khan, Y. Ding, G. Ren, *Nat. Prod. Commun.* **2016**, *11*, 1843.
- [13] E.T. Arung, K. Shimizu, H. Tanaka, R. Kondo, *Lett. Drug Des. Discov.* **2010**, *7*, 602.
- [14] F. Ferrari, I. Messana, M.C. Araujo, *Planta Med.* **1989**, *55*, 70.
- [15] P.A. Segun, O.O. Ogbale, F.M.D. Ismail, L. Nahar, A.R. Evans, E.O.

- Ajaiyeoba, S.D. Sarker, *Fitoterapia* **2019**, *134*, 151.
- [16] M. Tanjung, E.H. Hakim, Elfahmi, J. Latip, *Nat. Prod. Commun.* **2012**, *7*, 1309.
- [17] S. Fang, B. Shieh, R. Wu, C. Lin, *Phytochemistry* **1995**, *38*, 535.
- [18] R. Miyata, M. Sahlan, Y. Ishikawa, H. Hashimoto, S. Honda, S. Kumazawa, *J. Nat. Prod.* **2019**, *82*, 205.
- [19] Z. Zheng, K. Cheng, J. Chao, J. Wu, M. Wang, *Food Chem.* **2008**, *106*, 529.
- [20] R. Miyata, M. Sahlan, Y. Ishikawa, H. Hashimoto, S. Honda, S. Kumazawa, *Nat. Prod. Res.* **2019**, *82*, 205.
- [21] J. Du, C. Wang, J. Yang, X. He, X. Han, C. Li, X. Chai, Y. Wang, Y. Zhu, Z. Li, *Nat. Prod. Res.* **2019**, *33*, 673.
- [22] Y. Cui, S. Taniguchi, T. Kuroda, T. Hatano, *Molecules* **2015**, *20*, 12500.
- [23] Y. Liu, Q. Sun, L. Li, S. Song, *Biochem. Syst. Ecol.* **2019**, *87*, 103958.
- [24] D.T.M. Huonga, L.T.N. Vu, L.T. Anh, N.T. Cuc, N.X. Nhiem, B.H. Tai, P.V. Kiem, M. Litaudon, T.D. Thach, C.V. Minh, V.C. Pham, *Phytochem. Lett.* **2019**, *34*, 39.
- [25] K. Chen, Z. Hu, W. Song, Z. Wang, J. He, X. Shi, Q. Cui, X. Qiao, M. Ye, *ACS Synth. Biol.* **2019**, *8*, 1858.
- [26] Z. Wang, S. Wang, Z. Xu, M. Li, K. Chen, Y. Zhang, Z. Hu, M. Zhang, Z. Zhang, X. Qiao, M. Ye, *Org. Lett.* **2019**, *21*, 2241.
- [27] M. Kaouadji, S. Chiron, J. Garcia, F. Thomasson, M. Tissut, P. Ravanel, *Pergamon* **1992**, *31*, 2131.
- [28] D.S. Jang, M. Cuendet, M.E. Hawthorne, L.B. Kardono, K. Kawanishi, H.H. Fong, R.G. Mehta, J.M. Pezzuto, A.D. Kinghorn, *Phytochemistry* **2002**, *61*, 867.
- [29] M. Wang, W. Yang, X. Liu, Q. Liu, H. Zheng, X. Wang, T. Shen, S. Wang, D. Ren, *Nat. Prod. Res.* **2020**, *1*.
- [30] J.Y. Kim, W.S. Lee, Y.S. Kim, M.J. Curtis-Long, B.W. Lee, Y.B. Ryu, K.H. Park, *J. Agr. Food Chem.* **2011**, *59*, 4589.
- [31] Z. Zheng, K. Cheng, Q. Zhu, X. Wang, Z. Lin, M. Wang, *J. Agr. Food Chem.* **2010**, *58*, 5368.

- [32] B.S. Simpson, D.J. Claudie, N.M. Smith, J.P. Gerber, R.A. Mckinnon, S.J. Semple, *Phytochemistry* **2011**, *72*, 1883.
- [33] L. Zhang, J. Ji, C. Lei, H. Wang, Q. Zhao, A. Hou, *J. Nat. Prod.* **2012**, *75*, 699.
- [34] Q. Jin, C. Lee, J.W. Lee, E.T. Yeon, D. Lee, S.B. Han, J.T. Hong, Y. Kim, M.K. Lee, B.Y. Hwang, *J. Nat. Prod.* **2014**, *77*, 1724.
- [35] N.T. Dat, P.T.X. Binh, L.T.P. Quynh, C. Van Minh, H.T. Huong, J.J. Lee, *Fitoterapia* **2010**, *81*, 1224.
- [36] S.M. Lee, Y.H. Song, Z. Uddin, Y.J. Ban, K.H. Park, *Rec. Nat. Prod.* **2017**, *11*, 514.
- [37] J. Qin, M. Fan, J. He, X. Wu, L. Peng, J. Su, X. Cheng, Y. Li, L. Kong, R. Li, Q. Zhao, *Nat. Prod. Res.* **2015**, *29*, 1711.
- [38] J.K. Cho, Y.B. Ryu, M.J. Curtis-Long, J.Y. Kim, D. Kim, S. Lee, W.S. Lee, K.H. Park, *Bioorg. Med. Chem. Lett.* **2011**, *21*, 2945.
- [39] F. Ferrari, F. Delle Monache, A.I. Suarez, R.S. Compagnone, *Fitoterapia* **2000**, *71*, 213.
- [40] Z. Zheng, H. Tan, M. Wang, *Fitoterapia* **2012**, *83*, 1008.
- [41] D. Wu, X. Zhang, X. Huang, X. He, G. Wang, W. Ye, *China J. Chin. Mater. Med.* **2010**, *35*, 1978.
- [42] S. Li, W. Li, Y. Wang, Y. Asada, K. Koike, *Bioorg. Med. Chem. Lett.* **2010**, *20*, 5398.
- [43] Y. Lin, Y. Kuang, K. Li, S. Wang, W. Song, X. Qiao, G. Sabir, M. Ye, *Bioorgan. Med. Chem.* **2017**, *25*, 3706.
- [44] N. Li, P. Zhang, H. Wu, J. Wang, F. Liu, W. Wang, *J. Funct. Foods* **2015**, *19*, 563.
- [45] K. Kajiyana, S. Demizu, Y. Hiraga, K. Kinoshita, K. Koyama, K. Takahashi, Y. Tamura, K. Okada, T. Kinoshita, *J Nat. Prod.* **1992**, *55*, 1197.
- [46] L.S.A. de Carvalho, R.B. Geraldo, J. de Moraes, P.L.S. Pinto, P. de F. Pinto, O. dos. S. Pereira Junior, A.A. da Silva Filho, *Exp. Parasitol.* **2015**, *159*, 207.
- [47] H. Edziri, M. Mastouri, M.A. Mahjoub, Z. Mighri, A. Mahjoub, L. Verschaeve, *Molecules* **2012**, *17*, 7284.

- [48] M. Li, X. Wu, X. Wang, T. Shen, D. Ren, *Nat. Prod. Res.* **2018**, *32*, 36.
- [49] B. Pinto, A. Bertoli, C. Noccioli, S. Garritano, D. Reali, L. Pistelli, *Phytother. Res.* **2008**, *22*, 362.
- [50] H.J. Lee, D.H. Lyu, U. Koo, K. Nam, S.S. Hong, K.O. Kim, K.H. Kim, D. Lee, W. Mar, *Arch. Pharm. Res.* **2012**, *35*, 163.
- [51] L. Pistelli, A. Bertoli, I. Giachi, A. Manunta, *J. Nat. Prod.* **1998**, *61*, 1404.
- [52] O.O. de Sayuri, L.A. de Souza, D.C. Baldoqui, M.H. Sarragiotto, A.A. Silva, *Química Nova* **2013**, *36*, 800.
- [53] T. Fukai, B. Cai, K. Maruno, Y. Miyakawa, M. Konishi, T. Nomura, *Phytochemistry* **1998**, *49*, 2005.
- [54] X. Hou, G. Ge, Z. Weng, Z. Dai, Y. Leng, L. Ding, L. Jin, Y. Yu, Y. Cao, J. Hou, *Bioorg. Chem.* **2018**, *80*, 577.
- [55] E.T. Arung, K. Shimizu, R. Kondo, *Nat. Prod. Commun.* **2011**, *6*, 1397.
- [56] J. He, P. Zhao, Z. Hu, S. Liu, Y. Kuang, M. Zhang, B. Li, C. Yun, X. Qiao, M. Ye, *Angew. Chem. Int. Ed. Engl* **2019**, *58*, 11513.
- [57] S. Wu, F. Han, M. Song, S. Chen, Q. Li, Q. Zhang, K. Zhu, J. Shen, *J. Agr. Food Chem.* **2019**, *67*, 10222.
- [58] X. Hou, G. Ge, Z. Weng, Z. Dai, Y. Leng, L. Ding, L. Jin, Y. Yu, Y. Cao, J. Hou, *Bioorg. Chem.* **2018**, *80*, 577.
- [59] S. Wu, F. Han, M. Song, S. Chen, Q. Li, Q. Zhang, K. Zhu, J. Shen, *J. Agr. Food Chem.* **2019**, *67*, 10222.
- [60] S. Wu, F. Han, M. Song, S. Chen, Q. Li, Q. Zhang, K. Zhu, J. Shen, *J. Agr. Food Chem.* **2019**, *67*, 10222.
- [61] L. Yao, Y. Su, Z. Yin, N. Qin, T. Li, C. Si, E. Liu, X. Gao, *Holzforschung* **2010**, *64*, 571.
- [62] M. Nagasaka, R. Hashimoto, Y. Inoue, K.I. Ishiuchi, M. Matsuno, Y. Itoh, M. Tokugawa, N. Ohoka, D. Morishita, H. Mizukami, T. Makino, H. Hayashi, *Molecules* **2018**, *23*, 1394.
- [63] M. Bai, C. Zheng, L. Wu, S. Wu, Y. Cai, G. Chen, C. Han, X. Song, *Chem. Nat. Compd.* **2018**, *54*, 350.
- [64] S. Mouffok, H.H.H.Y. Haba, C. Lavaud, C. Long, M. Benkhaled, *Rec. Nat.*

- Prod.* **2012**, *6*, 292.
- [65] S.A. Ahmed, E.M. Kamel, *The Scientific World Journal* **2014**, *2014*, 1.
- [66] P. Tsai, W. Huang, M. Hsieh, P. Sung, Y. Kuo, W. Wu, *Molecules* **2016**, *21*, 15.
- [67] A.M. Karimov, T.N. Slobodyanyuk, E.K. Botirov, *Chem. Nat. Compd.* **2017**, *53*, 745.
- [68] J. Li, Y. Wang, T.J. Smillie, I.A. Khan, *J. Pharmaceut. Biomed.* **2012**, *63*, 120.
- [69] Y.N. Elkin, N.I. Kulesh, A.Y. Stepanova, A.I. Solovieva, V.M. Kargin, A.Y. Manyakhin, *J. Plant Physiol.* **2018**, *231*, 277.
- [70] Y. Gong, X. Meng, Y. Zhu, *Biochem. Syst. Ecol.* **2018**, *80*, 122.
- [71] Y. Fan, S. Yue, Z. Guo, L. Xin, C. Wang, D. Zhao, H. Guan, C. Wang, *Molecules* **2018**, *23*, 1361.
- [72] Q. Wu, X. He, C. Jiang, W. Zhang, Z. Shi, H. Li, Y. Zhu, *Fitoterapia* **2018**, *124*, 113.
- [73] J.P. Dzoyem, H. Hamamoto, B. Ngameni, B.T. Ngadjui, k. Sekimizu, *Drug Discov. Ther.* **2013**, *7*, 66.
- [74] Q. Han, C. Qiao, J. Song, N. Yang, X. Cao, Y. Peng, D. Yang, S. Chen, H. Xu, *Chem. Biodivers.* **2007**, *4*, 940.
- [75] V. Kuete, B. Ngameni, B. Wiench, B. Krusche, C. Horwedel, B.T. Ngadjui, T. Efferth, *Planta Med.* **2011**, *77*, 1984.
- [76] J.P. Dzoyem, A.H.L. Nkuete, B. Ngameni, J.N. Eloff, *Arch. Pharm. Res.* **2017**, *40*, 1129.
- [77] M.M. Radwan, M.A. Elsohly, D. Slade, S.A. Ahmed, L. Wilson, A.T. El-Alfy, I.A. Khan, S.A. Ross, *Phytochemistry* **2008**, *69*, 2627.
- [78] S. Tahara, Y. Katagiri, J.L. Ingham, J. Mizutani, *Phytochemistry* **1994**, *36*, 1261.
- [79] N.O.A. Omisore, C.O. Adewunmi, E.O. Iwalewa, B.T. Ngadjui, T.K. Adenowo, B.M. Abegaz, J.A. Ojewole, J. Watchueng, *Braz. J. Med. Biol. Res.* **2005**, *38*, 1087.
- [80] W. Zhu, J. Qiu, Y. Zeng, P. Yi, H. Lou, J. Jian, M. Zuo, L. Duan, W. Gu, L.

- Huang, Y. Li, C. Yuan, X. Hao, *Phytochemistry* **2019**, *164*, 33.
- [81] W. Chiou, C. Lee, J. Liao, C. Chen, *Life Sci.* **2011**, *88*, 335.
- [82] W. Chiou, C. Chen, B. Wei, *Ecid.-based Compl. Alt.* **2011**, *2011*, 1.
- [83] K. Feng, R. Chen, K. Xie, D. Chen, B. Guo, X. Liu, J. Liu, M. Zhang, J. Dai, *Org. Biomol. Chem.* **2018**, *16*, 452.
- [84] J.H. Kim, Y.B. Ryu, N.S. Kang, B.W. Lee, J.S. Heo, I.Y. Jeong, K.H. Park, *Biol. Pharm. Bull.* **2006**, *29*, 302.
- [85] J.H. Kim, I.S. Cho, Y.K. So, H. Kim, Y.H. Kim, *J. Enzym. Inhib. Med. Ch.* **2018**, *33*, 1048.
- [86] L. Ma, F. Xu, F. Li, J. Wang, M. Shang, G. Liu, S. Cai, *Biomed. Chromatogr.* **2016**, *30*, 175.
- [87] D. Lee, K.P.L. Bhat, H.H.S. Fong, N.R. Farnsworth, J.M. Pezzuto, A.D. Kinghorn, *J. Nat. Prod.* **2001**, *64*, 1286.
- [88] T. Fukai, M. Yonekawa, A. Hou, T. Nomura, H. Sun, J. Uno, *J. Nat. Prod.* **2003**, *66*, 1118.
- [89] K. Akter, E.C. Barnes, W.L. Loa-Kum-Cheung, P. Yin, M. Kichu, J.J. Brophy, R.A. Barrow, I. Imchen, S.R. Vemulpad, J.F. Jamie, *J. Ethnopharmacol.* **2016**, *185*, 171.
- [90] P. Erasto, G. Bojase-Moleta, R.R.T. Majinda, *Phytochemistry* **2004**, *65*, 875.
- [91] S. Wei, L. Lu, Z. Ji, J. Zhang, W. Wu, *Chem. Nat. Compd.* **2012**, *48*, 484.
- [92] A.E. Nkengfack, A.G. Azebaze, A.K. Waffo, Z.T. Fomum, M. Meyer, F.R. van Heerden, *Phytochemistry* **2001**, *58*, 1113.
- [93] Y. Wang, A. Hou, G. Zhu, D. Chen, H. Sun, *Planta Med.* **2005**, *71*, 273.
- [94] P. Innok, T. Rukachaisirikul, A. Suksamrarn, *Chem. Pharm. Bull.* **2009**, *57*, 993.
- [95] C. Chang, C. Lin, S. Kadota, M. Hattori, T. Namba, *Phytochemistry* **1995**, *40*, 945.
- [96] J. Cho, H. Park, G. Huh, S.S. Lee, M. Bang, K. Choi, C. Oh, S. Ko, S. Cho, K. Chai, J. Kim, N. Baek, *Food Sci. Biotechnol.* **2014**, *23*, 1815.
- [97] X Li, N. Wang, M. S. Wong, S. C. C. Albert, X. Yao, *Chem. Pharm. Bull.* **2006**, *54*, 570.



- [98] Z. Cao, Q. Zeng, H. Pei, L. Ren, H. Bai, R. Na, *Oncol. Lett.* **2016**, *11*, 3719.
- [99] H. Sato, S. Tahara, J.L. Ingham, S.Z. Dziedzic, *Phytochemistry* **1995**, *39*, 673.
- [100] S. Djiogue, M. Halabalaki, X. Alexi, D. Njamen, Z.T. Fomum, M.N. Alexis, A. Skaltsounis, *J. Nat. Prod.* **2009**, *72*, 1603.
- [101] A. Wojakowska, K. Kułak, M. Jasiński, P. Kachlicki, S. Stawiński, M. Stobiecki, *Acta Physiol. Plant.* **2015**, *37*, 152.
- [102] D.M. Biondi, C. Rocco, G. Ruberto, *J. Nat. Prod.* **2003**, *66*, 477.
- [103] S. El-Masry, M.E. Amer, M.S. Abdel-Kader, H.H. Zaatout, *Phytochemistry* **2002**, *60*, 783.
- [104] A.H. Tuan, D.T. Tuan, D.T. Trang, B.H. Tai, N.X. Nhiem, P.H. Yen, P.V. Kiem, C.V. Minh, Duc TM, H.K. Kang, Y.C. Kim, Y.H. Kim, *J. Asian Nat. Prod. Res.* **2017**, *19*, 510.
- [105] Eerdunbayaer, M.A.A. Orabi, H. Aoyama, T. Kuroda, T. Hatano, *Molecules* **2014**, *19*, 13027.
- [106] S. Kumar, A.S. Pathania, A.K. Saxena, R.A. Vishwakarma, A. Ali, S. Bhushan, *Chem. Biol. Interact.* **2013**, *205*, 128.
- [107] M. Stobiecki, A. Staszów, A. Piasecka, P.M. Garcia-Lopez, F. Zamora-Natera, P. Kachlicki, *J. Nat. Prod.* **2010**, *73*, 1254.
- [108] S. Toda, Y. Shirataki, *Pharm. Biol.* **2002**, *40*, 422.
- [109] K. Akiyama, F. Tanigawa, T. Kashihara, H. Hayashi, *Phytochemistry* **2010**, *71*, 1865.
- [110] K. Pranorm, R. Nijisiri, S.E. Ö, *Heterocycles* **2004**, *63*, 879.
- [111] P. Khaomek, C. Ichino, A. Ishiyama, H. Sekiguchi, M. Namatame, N. Ruangrunsi, E. Saifah, H. Kiyohara, K. Ootoguro, S. Omura, H. Yamada, *J. Nat. Med.* **2008**, *62*, 217.
- [112] A.E. Nkengfack, A.K. Waffo, G.A. Azebaze, Z.T. Fomum, M. Meyer, B. Bodo, F.R. van Heerden, *J. Nat. Prod.* **2000**, *63*, 855.
- [113] G. Xiao, G. Li, L. Chen, Z. Zhang, J. Yin, T. Wu, Z. Cheng, X. Wei, Z. Wang, *J. Chromatogr. A* **2010**, *34*, 5470.
- [114] F. Cottiglia, L. Casu, L. Bonsignore, M. Casu, C. Floris, M. Leonti, J.

- Gertsch, J. Heilmann, *Planta Med.* **2005**, *71*, 254.
- [115] L. Pistelli, C. Noccioli, G. Appendino, F. Bianchi, O. Sterner, M. Ballero, *Phytochemistry* **2003**, *64*, 595.
- [116] R.F. Souza, G.A. da Silva, A.C. Arruda, M.N. da Silva, A.S. Santos, D.P.A. Grisólia, M.B. Silva, C. Salgado, M.S.P. Arruda, *J. Brazil. Chem. Soc.* **2016**, *28*, 1132.
- [117] M.S. Ali, M.I. Ali, P.A. Onocha, Z. Ahmed, *J. Asian Nat. Prod. Res.* **2011**, *13*, 182.
- [118] D.M. Biondi, C. Rocco, G. Ruberto, *J. Nat. Prod.* **2005**, *68*, 1099.
- [119] J. Ren, Q. Huang, Y. Xu, M. Yang, J. Yang, K. Hu, *Anti-Cancer Drug.* **2015**, *26*, 599.
- [120] L. Pistelli, K. Spera, G. Flamini, S. Mele, I. Morelli, *Phytochemistry* **1996**, *42*, 1455.
- [121] S. Wei, W. Wu, Z. Ji, *Int. J. Mol. Sci.* **2012**, *13*, 7375.
- [122] G. Shen, D. Huhman, Z. Lei, J. Snyder, L.W. Sumner, R.A. Dixon, *Plant Physiol.* **2012**, *159*, 70.
- [123] T. Fukai, A. Marumo, K. Kaitou, T. Kanda, S. Terada, T. Nomura, *Life Sci.* **2002**, *71*, 1449.
- [124] H.N. Elsohly, A.S. Joshi, A.C. Nimrod, L.A. Walker, A.M. Clark, *Planta Med.* **2001**, *67*, 87.
- [125] F. Sun, Q. Li, J. Xu, *Chem. Biodivers.* **2017**, *14*, 1600193.
- [126] J.S. Jeon, S.M. Kim, H.J. Lee, B.H. Um, H.K. Kim, C.Y. Kim, *J. Liq. Chromatogr. R. T.* **2012**, *35*, 1607.
- [127] S. Yin, C. Fan, Y. Wang, L. Dong, J. Yue, *Bioorgan. Med. Chem.* **2004**, *12*, 4387.
- [128] A.E. Nkengfack, J. Kouam, T.W. Vouffo, M. Meyer, M.S. Tempesta, Z.T. Fomum, *Pergamon* **1994**, *35*, 521.
- [129] A. Yenesew, B. Irungu, S. Derese, J.O. Midiwo, M. Heydenreich, M.G. Peter, *Phytochemistry* **2003**, *63*, 445.
- [130] B.B. Lemes, L. Da Silva Miguêz, R.L. Santos, J.C. Da Rocha Bastos Serafim, J.M.R. Figueiredo, I.F. Tavares, M. de Godoi Pereira, E. de Jesus

- Marquês, F. Da Silva Ramos, R.S. El-Bachá, A.I. Ribeiro, M.F. Das Graças Fernandes Da Silva, L.C. de Souza Neta, *Phytochem. Lett.* **2019**, *30*, 181.
- [131] S.H. Shim, *J. Korean Soc. Appl. Biol. Chem.* **2009**, *52*, 568.
- [132] S.R. Shah, C.I. Ukaegbu, H.A. Hamid, O.R. Alara, *Food Measure* **2018**, *12*, 1947.
- [133] C. Na, S. Hong, Y. Choi, Y. Lee, S. Hong, J. Lim, B. Kang, S. Park, D. Lee, *Arch. Pharm. Res.* **2010**, *33*, 999.
- [134] L. Luan, X. Shen, X. Liu, Y. Wu, M. Tan, *Biomed. Chromatogr.* **2018**, *32*, 4059.
- [135] H. Liu, Y. Bai, Y. Chen, Y. Zhao, *China J. Chin. Mater. Med.* **2008**, *33*, 1410.
- [136] S. Kaennakam, E.R. Sukandar, K. Rassamee, P. Siripong, S. Tip-Pyang, *Phytochem. Lett.* **2019**, *31*, 187.
- [137] X. Wang, D. Wang, X. Wang, M. Khutsishvili, K. Tamanyan, G. Fayvush, D. Atha, Y. Zhang, R.P. Borris, *Planta Med.* **2019**, *85*, 225.
- [138] C.A. Sabphon, P.B. Temkitthawon, K.C. Ingkaninan, P.C. Sawasdee, *Nat. Prod. Commun.* **2015**, *10*, 301.
- [139] Y. Lu, S. Zhu, Y. He, C. Peng, Z. Wang, Q. Tang, *Int. J. Mol. Sci.* **2019**, *20*, 3396.
- [140] J. Zhang, W. Zhu, J. Xu, W. Kitdamrongtham, A. Manosroi, J. Manosroi, H. Tokuda, M. Abe, T. Akihisa, F. Feng, *J. Ethnopharmacol.* **2018**, *214*, 37.
- [141] S. Hong, J. Kwon, N.T. Hiep, S.J. Sim, N. Kim, K.H. Kim, D. Lee, W. Mar, *J. Funct. Foods* **2018**, *40*, 785.
- [142] M. Babaoglu, M.R. Davey, J.B. Power, F. Sporer, M. Wink, *Plant cell, Tissue Organ Cult.* **2004**, *78*, 29.
- [143] K.H. Yoon, K.J. Park, J. Yin, K.H. Yoon, J.Y. Lee, Y.J. Hwang, D.I. Lee, Y.W. Choi, M.W. Lee, *Rec. Nat. Prod.* **2016**, *10*, 441.
- [144] A. Yenesew, J.O. Midiwo, M. Heydenreich, D. Schanzenbach, M.G. Peter, *Phytochemistry* **2000**, *55*, 457.
- [145] E. Talla, E. Yankep, J. Tanyi Mbafor, *B. Chem. Soc. Ethiopia* **2014**, *28*, 155.
- [146] J. Wandji, Z.T. Fomum, F. Tillequin, G. Baudouin, M. Koch, *Pergamon*

- 1994**, 35, 1573.
- [147] E. Bae, M. Na, D. Njamen, J. Mbafor, Z. Fomum, L. Cui, D. Choung, B. Kim, W. Oh, J. Ahn, *Planta Med.* **2006**, 72, 945.
- [148] Y. Orazbekov, M.A. Ibrahim, S. Mombekov, R. Srivedavyasasri, U. Datkhayev, B. Makhatov, N.D. Chaurasiya, B.L. Tekwani, S.A. Ross, *Evid-Based Compl. Alt.* **2018**, 2018, 1370368.
- [149] X. Jiang, C. Cao, W. Sun, Z. Chen, X. Li, L. Nahar, S.D. Sarker, M.I. Georgiev, W. Bai, *Food Chem. Toxicol.* **2019**, 126, 56.
- [150] J. Kouam, X.S. Noundou, L.B. Kouitcheu Mabeku, A.M. Lannang, M.I. Choudhary, Z.T. Fomum, *B. Chem. Soc. Ethiopia* **2007**, 21, 373.
- [151] E. Talla, D. Njamen, J.T. Mbafor, Z.T. Fomum, A. Kamanyi, J. Mbanya, R.M. Giner, M.C. Recio, S. Máñez, J.L. Ríos, *J. Nat. Prod.* **2003**, 66, 891.
- [152] A. Tedasen, S. Sukrong, B. Sritularak, T. Srisawat, P. Graidist, *Biomed. Pharmacother.* **2016**, 81, 235.
- [153] P. Posri, J. Suthiwong, P. Takomthong, C. Wongsas, C. Chuenban, C. Boonyarat, C. Yenjai, *Nat. Prod. Res.* **2019**, 33, 1115.
- [154] P. Maximo, A. Lourenco, S.S. Feio, J.C. Roseiro, *Z Naturforsch C J Biosci* **2002**, 57, 609.
- [155] S. Sangmalee, A. Laorpaksa, B. Sritularak, S. Sukrong, *Biol. Pharm. Bull.* **2016**, 39, 631.
- [156] H. Yamamoto, P. Zhao, K. Inoue, *Phytochemistry* **2002**, 60, 263.
- [157] S. Deachathai, W. Mahabusarakam, S. Phongpaichit, W.C. Taylor, *Phytochemistry* **2005**, 66, 2368.
- [158] N. Chaichamnong, P. Temkitthawon, N. Khorana, P. Pitpakdeeanan, P. Taepavarapruk, N. Nuengchamnong, Y. Siriwattanasathien, A. Suksamrarn, K. Ingkaninan, *Planta Med.* **2018**, 84, 1134.
- [159] Y. H. Jo, K. M. Choi, Q. Liu, S. B. Kim, H. J. Ji, M. Kim, S. S. Shin, S. G. Do, E. Shin, G. Jung, H. S. Yoo, B. Y. Hwang, M. K. Lee, *Nutrients* **2015**, 7, 10480.
- [160] D.C. Bilanda, R.À.G. Bidingha, P.D. Djomeni Dzeufiet, Y.B. Fouda, R.F. Ngapout, Y. Tcheutchoua, P.E. Owona, S.C. Njonte Wouamba, L. Tanfack

- Tatchou, T. Dimo, P. Kamtchouing, *J. Ethnopharmacol.* **2020**, *246*, 112200.
- [161] A.J.Y. Gbaweng, H. Dairou, S. Zingué, T. Emmanuel, A.T. Tchinda, M. Frédérick, J.T. Mbafor, *Nat. Prod. Res.* **2020**, *34*, 659.
- [162] S. Nagumo, A. Fukuju, M. Takayama, M. Nagai, R. Yanoshita, Y. Samejima, *Biol. Pharm. Bull.* **1999**, *10*, 1144.
- [163] S. Ahn, S. Park, Y.J. Lee, E. Cho, Y.K. Lim, X.M. Li, M. Choi, Y. Seo, J. Kook, *Caries Res.* **2015**, *49*, 78.
- [164] G.R. Shin, S. Lee, S. Lee, S. Do, E. Shin, C.H. Lee, *Ind. Crop. Prod.* **2015**, *70*, 322.
- [165] Y. Zhang, X. Li, X. Yao, M. Wong, *Arch. Pharm. Res.* **2008**, *31*, 1534.
- [166] J. Lee, W. K. Oh, J. S. Ahn, Y. H. Kim, J. T. Mbafor, J. Wandji, Z. T. Fomum, *Planta Med.* **2009**, *75*, 268.
- [167] J. R. Villinski, C. Bergeron, J. C. Cannistra, J. B. Gloer, C. M. Coleman, D. Ferreira, J. Azelmat, D. Grenier, S. Gafner, *J. Nat. Prod.* **2014**, *77*, 521.
- [168] P. Gyoergy, K. Murata, H. Ikehata, *Nature* **1964**, *203*, 872.
- [169] L. Guo, X. Yang, X. Sun, X. Wu, *Phytochem. Lett.* **2017**, *20*, 32.
- [170] A. Hirota, M. Inaba, Y.C. Chen, N. Abe, S. Taki, M. Yano, S. Kawaii, *Biosci. Biotechnol. Biochem.* **2004**, *68*, 1372.
- [171] Q. Luo, Q. Chen, Y. Wu, M. Jiang, Z. Chen, X. Zhang, H. Chen, *China J. Chin. Mater. Med.* **2010**, *35*, 2416.
- [172] J. Bórquez, E.J. Kennelly, M.J. Simirgiotis, *Food Res. Int.* **2013**, *52*, 288.
- [173] M. Inuma, M. Ohyama, T. Tanaka, M. Mizuno, H. Soon-Keun, *Phytochemistry* **1993**, *33*, 1241.
- [174] Z. Zhang, W. Yuan, P. Wang, G. Grant, S. Li, *Nat. Prod. Res.* **2011**, *25*, 1641.
- [175] Y. Zhang, X. Xu, B. Hu, Q. Liu, C. Hou, Y. Liu, J. Yang, *Acta Pharm. Sin.* **1997**, *32*, 301.
- [176] G. A. Lane, O. R. W. Sutherland, R. A. Skipp, *J. Chem. Ecol.* **1987**, *13*, 771.
- [177] S. A. Adesany, M. J. O. A. Roberts, *Phytochemistry* **1985**, *24*, 2699.
- [178] Y. Lin, Y. Kuang, K. Li, S. Wang, S. Ji, K. Chen, W. Song, X. Qiao, M. Ye, *Bioorgan. Med. Chem.* **2017**, *25*, 5522.

- [179] M. Wang, W. Yang, X. Liu, Q. Liu, H. Zheng, X. Wang, T. Shen, S. Wang, D. Ren, *Nat. Prod. Res.* **2020**, *1*.
- [180] V. Kuete, L.P. Sandjo, G.M.N. Kwamou, B. Wiench, A.E. Nkengfack, T. Efferth, *Phytomedicine* **2014**, *21*, 682.
- [181] D. E. Djeussi, L. P. Sandjo, J. A. K. Noumedem, L. K. Omosa, B. T. Ngadjui, V. Kuete, *BMC Complem. Altern. M.* **2015**, *15*, 453.
- [182] M. Chacha, G. Bojasemoleta, R. Majinda, *Phytochemistry* **2005**, *66*, 99.
- [183] Q. Xu, Y. Hu, G. Li, W. Xu, Y. Zhang, X. Yang, *Molecules* **2018**, *23*, 614.
- [184] H. Li, X. Meng, Y. Jiang, X. Lin, D. Xiong, D. Wang, H. Lee, L. Cui, *Phytochem. Lett.* **2018**, *28*, 130.
- [185] C. Rodríguez-Pérez, R. Quirantes-Piné, N. Amessis-Ouchemoukh, K. Madani, A. Segura-Carretero, A. Fernández-Gutierrez, *J. Pharmaceut. Biomed.* **2013**, *77*, 167.
- [186] T. Rukachaisirikul, P. Innok, N. Aroonrerk, W. Boonamnuaylap, S. Limrangsun, C. Boonyon, U. Woonjina, A. Suksamrarn, *J. Ethnopharmacol.* **2007**, *110*, 171.
- [187] X. Yang, S. Deng, M. Huang, J. Wang, L. Chen, M. Xiong, J. Yang, S. Zheng, X. Ma, P. Zhao, Y. Feng, *Bioorg. Med. Chem. Lett.* **2017**, *27*, 1463.
- [188] M. Mizuno, N. Matsuura, M. Iinuma, T. Tanaka, *Phytochemistry* **1992**, *31*, 643.
- [189] M. Iinuma, M. Ohyama, T. Tanaka, *Phytochemistry* **1995**, *38*, 539.
- [190] O. R. Alara, N. H. Abdurahman, C. I. Ukaegbu, N. H. Azhari, N. A. Kabbashi, *J. Liq. Chromatogr. R. T.* **2018**, *41*, 722.
- [191] W. Lo, C. Wu, F. Chang, W. Wang, A. T. Khalil, K.H. Lee, Y. Wu, *Nat. Prod. Res.* **2003**, *17*, 91.
- [192] M. Mizuno, T. Tanaka, N. Matsuura, M. Iinuma, C. Cheih, *Phytochemistry* **1990**, *29*, 2738.
- [193] Y. Yang, Y. Zhang, Z. Chen, Y. Zhang, X. Yang, *Phytomedicine* **2018**, *38*, 166.
- [194] C.F. Sampaio, N.R. Lucchetta, A.P.F. Punhagui, P.R. Banedetti, N.S. Arakawa, F.R.F. Seiva, G.S.A. Fernandes, *Microsc. Res. Techniq.* **2019**, *82*,

345.

- [195] X. Liu, Y. Zhang, X. Yang, Y. Yang, W. Xu, W. Zhao, K. Peng, Y. Gong, N. Liu, P. Zhang, *Molecules* **2019**, *24*, 3750.
- [196] R. Wen, H. Lv, Y. Jiang, P. Tu, *Planta Med.* **2018**, *84*, 1174.
- [197] L. D. Dat, N. T. M. Tu, N. V. Duc, B. T. T. Luyen, C. T. T. Huyen, H. J. Jang, D. T. Thu, T. T. Huong, L. H. Tram, N. V. Thong, N. D. Hung, Y. H. Kim, N. P. Thao, *Carbohydr. Res.* **2019**, *484*, 107778.
- [198] F. Kuang, Y. Liu, Y. Chen, R. Zhan, *Nat. Prod. Res.* **2020**, *34*, 390.
- [199] S. Lam, Y. Li, P. Kuo, T. Hwang, M. Yang, C. Wang, J. Tzen, *Molecules* **2019**, *24*, 1371.
- [200] Y. Hsu, W. Lai, C. Li, Y. Lan, Y. Tsai, A. Hunyadi, M. Hou, Y.S. Shiou, Y. Wu, F. Chang, *Nat. Prod. Commun.* **2016**, *11*, 1099.
- [201] J. Yang, X. Zhou, X. Nong, J. Cao, Y. Hui, M. Wen, W. Chen, *Nat. Prod. Res.* **2020**, *9*, 1.
- [202] Y. Cui, H. Yang, J. Jing, T. Liu, R. Wang, F. Di, F. Han, Y. Zhao, Z. Yu, *J. Pharmaceut. Biomed.* **2020**, *179*, 113029.
- [203] M. Cao, H. Yuan, M. Daniyal, H. Yu, Q. Xie, Y. Liu, B. Li, Y. Jian, C. Peng, D. Tan, Y. Peng, M.I. Choudhary, A. Rahman, W. Wang, *Fitoterapia* **2019**, *138*, 104276.
- [204] J. Kwon, N.T. Hiep, D.W. Kim, S. Hong, Y. Guo, B.Y. Hwang, H.J. Lee, W. Mar, D. Lee, *J. Nat. Prod.* **2016**, *79*, 1938.
- [205] Y. Zhang, D. Zhou, W. Liu, C. Li, L. Hao, G. Zhang, S. Deng, R. Yang, J. Qin, J. Li, W. Deng, *Chem. Biodivers.* **2019**, *16*, 1800465.
- [206] B. Zhou, C.X. Wan, *J. Asian Nat. Prod. Res.* **2015**, *17*, 256.
- [207] D.W. Kim, H.S. Woo, J.Y. Kim, J.A. Ryuk, K.H. Park, B.S. Ko, *J. Enzyme Inhib. Med. Chem.* **2016**, *31*, 742.
- [208] X. Yu, S.M. Li, *Chembiochem.* **2011**, *12*, 2280.
- [209] Y. Fan, R. Ye, H. Xu, X. Feng, C. Ma, *J. Food Sci.* **2019**, *84*, 1224.
- [210] K. W. Kim, T. H. Quang, W. Ko, D. C. Kim, C. S. Yoon, H. Oh, Y. C. Kim, *Pharm. Biol.* **2018**, *56*, 192.
- [211] W. Quan, L. Hee, K. Chul, N. Chu, U. Byung, O. Min-Ho, K. Kyeong-Man,

- Planta Med.* **2008**, *74*, 168.
- [212] W. Lo, F. Chang, T. Hsieh, Y. Wu, *Phytochemistry* **2002**, *60*, 839.
- [213] M. Bobrowska-Hagerstrand, A. Wrobel, L. Mrowczynska, T. Soderstrom, Y. Shirataki, N. Motohashi, J. Molnar, K. Michalak, H. Hagerstrand, *Oncol. Res.* **2003**, *13*, 463.
- [214] W. Kitdamrongtham, K. Ishii, K. Ebina, J. Zhang, M. Ukiya, K. Koike, H. Akazawa, A. Manosroi, J. Manosroi, T. Akihisa, *Chem. Biodivers.* **2014**, *11*, 73.
- [215] B. A. Schütz, A. D. Wright, T. Rali, O. Sticher, *Phytochemistry* **1995**, *40*, 1273.
- [216] T. Tanaka, M. Inuma, F. Asai, M. Ohyama, C. L. Burandt, *Phytochemistry* **1997**, *46*, 1431.
- [217] X. Wang, L. Zhen, G. Zhang, M. Wong, L. Qin, X. Yao, *Phytomedicine* **2011**, *18*, 868.
- [218] Q. Ye, X. Ma, C. Hu, B. Lin, L. Xu, C. Zheng, L. Qin, *Phytomedicine* **2015**, *22*, 94.
- [219] J. Du, Z. He, R. Jiang, W. Ye, H. Xu, P.P. But, *Phytochemistry* **2003**, *62*, 1235.
- [220] H. Sasaki, Y. Kashiwada, H. Shibata, Y. Takaishi, *Phytochemistry* **2012**, *82*, 136.
- [221] H. Sasaki, H. Shibata, K. Imabayashi, Y. Takaishi, Y. Kashiwada, *J. Agr. Food Chem.* **2014**, *62*, 6345.
- [222] M. Inuma, M. Ohyama, T. Tanaka, F.A. Lang, *J. Nat. Prod.* **1993**, *56*, 2212.
- [223] F. Hiroshi, G. Katsumi, T. Mamoru, *Chem. Pharm. Bull.* **1988**, *36*, 4174.
- [224] Y. Li, J. Ning, Y. Wang, C. Wang, C. Sun, X. Huo, Z. Yu, L. Feng, B. Zhang, X. Tian, X. Ma, *Toxicol. Lett.* **2018**, *294*, 27.
- [225] J. W. Lee, J. H. Lee, C. Lee, Q. Jin, D. Lee, Y. Kim, J.T. Hong, M. K. Lee, B.Y. Hwang, *Bioorg. Med. Chem. Lett.* **2015**, *25*, 960.
- [226] H. N. Elsohly, A. S. Joshi, A. C. Nimrod, L. A. Walker, A. M. Clark, *Planta Med.* **2001**, *67*, 87.
- [227] M. Maya, Y. Hiromi, W. Tsutomu, M. Toshio, *J. Nat. Prod.* **2009**, *72*, 63.



- [228] N. O. Omisore, C. O. Adewunmi, E. O. Iwalewa, B. T. Ngadjui, T. K. Adenowo, B. M. Abegaz, J. A. Ojewole, J. Watchueng, *Braz. J. Med. Biol. Res.* **2005**, *38*, 1087.
- [229] M. Lin, D. Xiang, X. Chen, H. Huo, *J. Agr. Food Chem.* **2019**, *67*, 8291.
- [230] J. Y. Park, J. A. Ko, D. W. Kim, Y. M. Kim, H. J. Kwon, H. J. Jeong, C. Y. Kim, K. H. Park, W. S. Lee, Y. B. Ryu, *J. Enzyme Inhib. Med. Chem.* **2016**, *31*, 23.
- [231] K. Kawabata, Y. Kato, T. Sakano, N. Baba, K. Hagiwara, A. Tamura, S. Baba, M. Natsume, H. Ohigashi, *Biosci. Biotechnol. Biochem.* **2015**, *79*, 799.
- [232] D. Nikolic, R.B. van Breemen, *Curr. Anal. Chem.* **2013**, *9*, 71.
- [233] S. Venturelli, M. Burkard, M. Biendl, U. M. Lauer, J. Frank, C. Busch, *Nutrition* **2016**, *32*, 1171.
- [234] I. L. Paraiso, L. S. Plagmann, L. Yang, R. Zielke, A. F. Gombart, C. S. Maier, A. E. Sikora, P. R. Blakemore, J. F. Stevens, *Mol. Nutr. Food Res.* **2019**, *63*, 1800923.
- [235] T. Maliar, P. Nemeček, E. ürgeová, M. Maliarová, V. Nesvadba, K. Krofta, K. Vulganová, E. Krošlák, J. Kraic, *Chem. Pap.* **2017**, *71*, 41.
- [236] B. Ngameni, M. Touaibia, R. Patnam, A. Belkaid, P. Sonna, B.T. Ngadjui, B. Annabi, R. Roy, *Phytochemistry* **2006**, *67*, 2573.
- [237] T. Fukai, J. Nishizawa, T. Nomura, *Pergamon.* **1994**, *35*, 515.
- [238] J. Chen, M. Cheng, C. Shu, P. Sung, Y. Lim, L. Cheng, S. Wang, L. Chen, *Chem. Nat. Compd.* **2017**, *53*, 632.
- [239] X. Wang, *J. Intel. Mat. Syst. Str.* **2017**, *29*, 255.
- [240] K. Kajiyama, S. Demizu, Y. Hiraga, K. Kinoshita, K. Koyama, K. Takahashi, Y. Tamura, K. Okada, T. Kinoshita, *Pergamon* **1992**, *31*, 3229.
- [241] C. Simmler, D.C. Lankin, D. Nikolić, R.B. van Breemen, G.F. Pauli, *Fitoterapia* **2017**, *121*, 6.
- [242] R. Muharini, A. Díaz, W. Ebrahim, A. Mándi, T. Kurtán, N. Rehberg, R. Kalscheuer, R. Hartmann, R.S. Orfali, W. Lin, Z. Liu, P. Proksch, *J. Nat. Prod.* **2016**, *80*, 169.
- [243] J. Lee, H. Mei, I. Kuo, T. Lee, Y. Chen, C. Lee, *Molecules* **2019**, *24*, 3297.

- [244] F. S. Wahyuni, D. A. I. Ali, N. H. Lajis, Dachriyanus, *Pharmacogn. J.* **2016**, *9*, 55.
- [245] B. A. Tonalı, L. H. Rafael, M. S. L. Elizabrth, R. C. Ricardo, R. L. Edgar, P. Benjamin, N. M. C. Omar, S. C. Laura, P. Enrique, C. Trejo, S. A. Daniela, P. C. Jose, R. Camilo, P. Veronica, T. r. Monica, *BMC Complement Altern. Med.* **2013**, *13*, 262.
- [246] R. Achara, S. Tawanun, M. Wisanu, *Nat. Prod. Commun.* **2015**, *10*, 1969.
- [247] M. Tanjung, T. S. Tjahjandarie, R. D. Saputri, B. D. Kurnia, M. F. Rachman, Y. M. Syah, *Nat. Prod. Res.* **2021**, *35*, 407.
- [248] N. Kheyar-Kraouche, A. B. Da Silva, A. T. Serra, F. Bedjou, M. R. Bronze, *J. Pharmaceut. Biomed.* **2018**, *156*, 297.
- [249] S. S. Teh, G. C. L. Ee, S. H. Mah, *Asian Journal of Chemistry* **2013**, *25*, 8780.
- [250] C. Ito, T. Matsui, A. Niimi, H.T. Tan, M. Itoigawa, *Planta Med.* **2017**, *83*, 812.
- [251] H. T. Vo, N. T. N. Ngo, T. Q. Bui, H. D. Pham, L. D. Nguyen, *Phytochem. Lett.* **2015**, *13*, 119.
- [252] P. Nugitragson, S. C. Puthong, T. Iempridee, W. Pimtong, S. Pornpakakul, C. Chanchao, *Exp. Biol. Med.* **2016**, *241*, 166.
- [253] A. Aravind, R. Pandey, B. Kumar, K. Asha, K.B. Rameshkumar, *Nat. Prod. Commun.* **2016**, *11*, 1839.
- [254] N. Jamila, M. Khairuddean, S.N. Khan, N. Khan, H. Osman, *Rec. Nat. Prod.* **2014**, *8*, 312.
- [255] E. R. Sukandar, S. Kaennakam, K. Rassamee, T. Ersam, P. Siripong, S. Tip-Pyang, *J. Nat. Prod.* **2019**, *82*, 1312.
- [256] M. Zhou, K. Zhou, Y. Zhao, N. Xiang, T. Zhang, Y. Wang, W. Dong, B. Ji, L. Li, J. Lou, G. Li, Q. Hu, *Phytochem. Lett.* **2015**, *11*, 245.
- [257] B. T. D. Trinh, T. T. T. Quach, D. N. Bui, D. Staerk, L. D. Nguyen, A. K. Jäger, *Fitoterapia* **2017**, *118*, 126.
- [258] N. K. Nguyen, X. A. Truong, T. Q. Bui, D. N. Bui, H. X. Nguyen, P. T. Tran, L. D. Nguyen, *Chem. Biodivers.* **2017**, *14*, 1700232.

- [259] M. Y. Ibrahim, N. M. Hashim, S. Mohan, M. A. Abdulla, S. I. Abdelwahab, I. A. Arbab, M. Yahayu, L. Z. Ali, O. E. Ishag, *Arab. J. Chem.* **2015**, *8*, 129.
- [260] M. S. Meah, M. Lertcanawanichakul, P. Pedpradab, W. Lin, K. Zhu, G. Li, P. Panichayupakaranant, *Lett. Appl. Microbiol.* **2020**, *71*, 510.
- [261] Z. Na, Y. Xu, *Nat. Prod. Res.* **2010**, *24*, 1648.
- [262] Z. Na, Q. Song, B. I. H. Hua, *Rec. Nat. Prod.* **2013**, *7*, 220.
- [263] Y. Duan, Y. Dai, G. Wang, X. Zhang, H. Chen, J. Chen, X. Yao, X. Zhang, *J. Nat. Prod.* **2010**, *73*, 1283.
- [264] H. Zhang, D. Zhang, Y. Lao, W. Fu, S. Liang, Q. Yuan, L. Yang, H. Xu, *J. Nat. Prod.* **2014**, *77*, 2148.
- [265] O. Tusevski, J. Petreska Stanoeva, M. Stefova, D. Pavokovic, S. Gadzovska Simic, *Acta Physiol. Plant.* **2014**, *36*, 2555.
- [266] G. A. Mohamed, A. M. Al-Abd, A. M. El-Halawany, H. M. Abdallah, S. R. M. Ibrahim, *J. Ethnopharmacol.* **2017**, *198*, 302.
- [267] W. Schmidt, A.M. Abd el-Mawla, J.L. Wolfender, K. Hostettmann, L. Beerhues, *Planta Med.* **2000**, *66*, 380.
- [268] Q. Han, N. Yang, H. Tian, C. Qiao, J. Song, D.C. Chang, S. Chen, K.Q. Luo, H. Xu, *Phytochemistry* **2008**, *69*, 2187.
- [269] Q. Han, C. Qiao, J. Song, N. Yang, X. Cao, Y. Peng, D. Yang, S. Chen, H. Xu, *Chem. Biodivers.* **2007**, *4*, 940.
- [270] S. Niu, Z. Li, F. Ji, G. Liu, N. Zhao, X. Liu, Y. Jing, H. Hua, *Phytochemistry* **2012**, *77*, 280.
- [271] F. Ji, Z. Lin, G. Liu, S. Niu, N Zhang, X. Liu, H. Hua, *Nat. Prod. Commun.* **2012**, *7*.
- [272] P. Li, H. Anandhisenthilkumar, S. Wu, B. Liu, Z. Guo, J.E. Fata, E.J. Kennelly, C. Long, *J. Chromatogr. B* **2016**, *1011*, 179.
- [273] Y. Li, P. Zhao, Y. Chen, Y. Fu, K. Shi, L. Liu, H. Liu, M. Xiong, Q. Liu, G. Yang, Y. Xiao, *Bioorgan. Med. Chem.* **2017**, *25*, 6605.
- [274] Q. Hu, G. Li, M. Zhou, K. Zhou, Y. Zhao, N. Xiang, T. Zhang, Y. Wang, W. Dong, B. Ji, J. Lou, L. Li, C. Zhang, *Heterocycles* **2015**, *91*, 604.
- [275] Z. Wang, Y. Lin, T. Li, F. Dai, G. Luo, G. Xiao, C. Tang, *Int. J. Food Prop.*

- 2019**, 22, 1340.
- [276] N. Khamthong, N. Hutadilok-Towatana, *Nat. Prod. Commun.* **2017**, 12, 453.
- [277] A. Han, J. Kim, D. D. Lantvit, L. B. S. Kardono, S. Riswan, H. Chai, E. J. Carcache De Blanco, N. R. Farnsworth, S. M. Swanson, A. D. Kinghorn, *J. Nat. Prod.* **2009**, 72, 2028.
- [278] E. T. Ngouamegne, R. S. Fongang, S. Ngouela, F. F. Boyom, M. Rohmer, E. Tsamo, J. Gut, P.J. Rosenthal, *Chem. Pharm. Bull.* **2008**, 56, 374.
- [279] B. Ovalle-Magallanes, D. Eugenio-Pérez, J. Pedraza-Chaverri, *Food Chem. Toxicol.* **2017**, 109, 102.
- [280] S. Wang, Q. Li, M. Jing, E. Alba, X. Yang, R. Sabaté, Y. Han, R. Pi, W. Lan, X. Yang, J. Chen, *Neurochem. Res.* **2016**, 41, 1806.
- [281] L. D. Nguyen, H. T. Vo, H. D. Pham, J. D. Connolly, L. J. Harrison, *Phytochemistry* **2003**, 63, 467.
- [282] K. Trisuwan, T. Ritthiwigrom, *Arch. Pharm. Res.* **2012**, 35, 1733.
- [283] W. Jing, C Jiang, F. Ji, H. Hua, Z. Li, *J. Asian Nat. Prod. Res.* **2013**, 15, 1152.
- [284] S. R. M. Ibrahim, H. M. Abdallah, A. M. El-Halawany, M. F. Radwan, I. A. Shehata, E. M. Al-Harshany, M. F. Zayed, G. A. Mohamed, *Phytochem. Lett.* **2018**, 25, 12.
- [285] S. Ibrahim, H. M. Abdallah, A. M. El-Halawany, A. M. Nafady, G. A. Mohamed, *Nat. Prod. Res.* **2019**, 33, 258.
- [286] G. A. Mohamed, S. R. M. Ibrahim, M. I. A. Shaaban, S. A. Ross, *Fitoterapia* **2014**, 98, 215.
- [287] B. Vemu, M.C. Nauman, J.P. Veenstra, J.J. Johnson, *Int. J. Nutr.* **2019**, 4, 38.
- [288] H.S. Chae, E.Y. Kim, L. Han, N.R. Kim, B. Lam, J.H. Paik, K.D. Yoon, Y.H. Choi, Y.W. Chin, *Eur. J. Lipid Sci. Tech.* **2016**, 118, 1416.
- [289] H. Minami, E. Takahashi, M. Kodama, Y. Fukuyama, *Phytochemistry* **1996**, 41, 629.
- [290] S. Sanpa, M. Popova, V. Bankova, T. Tunkasiri, S. Eitsayeam, P. Chantawannakul, *PLoS One* **2015**, 10, 126886.
- [291] J. Ngoupayo, T.K. Tabopda, M.S. Ali, *Bioorgan. Med. Chem.* **2009**, 17,

5688.

- [292] B. Zhang, W. Fu, R. Wu, J. Yang, C. Yao, B. Yan, H. Tan, C. Zheng, Z. Song, H. Xu, *Planta Med.* **2019**, *85*, 444.
- [293] S. F. Mamat, K. A. Azizan, S. N. Baharum, N. M. Noor, W. M. Aizat, *Sci. Hortic.* **2020**, *262*, 109004.
- [294] A. Groweiss, J.H. Cardellina, M.R. Boyd, *J. Nat. Prod.* **2000**, *63*, 1537.
- [295] L.N. Mariano, D.B. Vendramini-Costa, A.L. Ruiz, J.E. de Carvalho, R. Correa, F.V. Cechinel, M.F. Delle, R. Niero, *Pharm. Biol.* **2016**, *54*, 1697.
- [296] C. Tantapakul, W. Phakhodee, T. Ritthiwigrom, S. Cheenpracha, U. Prawat, S. Deachathai, S. Laphookhieo, *J. Nat. Prod.* **2012**, *75*, 1660.
- [297] T. Sriyatep, C. Tantapakul, R.J. Andersen, B.O. Patrick, S.G. Pyne, C. Muanprasat, S. Seemakhan, S. Borwornpinyo, S. Laphookhieo, *Fitoterapia* **2018**, *124*, 34.
- [298] X. Liu, X. Hu, X. Peng, Y. Wang, X. Huang, Y. Zan, D. Li, Z. Li, H. Hua, *Bioorg. Chem.* **2020**, *94*, 103370.
- [299] J. Nontakham, N. Charoenram, W. Upamai, M. Taweechotipatr, S. Suksamrarn, *Arch. Pharm. Res.* **2014**, *37*, 972.
- [300] Y. Ji, R. Zhang, C. Zhang, X. Li, A. Negrin, C. Yuan, E.J. Kennelly, C. Long, *Molecules* **2019**, *24*, 3568.
- [301] G. Zuo, J. An, J. Han, Y. Zhang, G. Wang, X. Hao, Z. Bian, *Int. J. Mol. Sci.* **2012**, *13*, 8210.
- [302] D.A. Mulholland, E.M. Mwangi, N.C. Dlova, N. Plant, N.R. Crouch, P.H. Coombes, *J. Ethnopharmacol.* **2013**, *149*, 570.
- [303] G. Rath, O. Potterat, S. Mavi, K. Hostettmann, *Phytochemistry* **1996**, *43*, 513.
- [304] L. Wang, Z. Li, H. Hua, X. Liu, *China J. Chin. Mater. Med.* **2008**, *33*, 2350.
- [305] T.Q. Bui, A.T. Bui, K.T. Nguyen, V.T. Nguyen, B.T. D. Trinh, L.D. Nguyen, *Tetrahedron Lett.* **2016**, *57*, 2524.
- [306] A. Lavaud, P. Richomme, M. Litaudon, R. Andriantsitohaina, D. Guilet, *J. Nat. Prod.* **2013**, *76*, 2246.
- [307] V. Kuete, J.R. Nguemeving, V.P. Beng, A.G.B. Azebaze, F. Etoa, M. Meyer,

- B. Bodo, A.E. Nkengfack, *J. Ethnopharmacol.* **2007**, *109*, 372.
- [308] K.W. Wong, G.C.L. Ee, I.S. Ismail, T. Karunakaran, V.Y.M. Jong, *Nat. Prod. Res.* **2017**, *31*, 2513.
- [309] J.R. Nguemeving, A.G. Azebaze, V. Kuete, C.N. Eric, V.P. Beng, M. Meyer, A. Blond, B. Bodo, A.E. Nkengfack, *Phytochemistry* **2006**, *67*, 1341.
- [310] I. Ramírez-González, J.M. Amaro-Luis, A. Bahsas, *Nat. Prod. Commun.* **2013**, *8*, 1731.
- [311] Q. Wu, S. Wang, L. Du, J. Yang, P. Xiao, *Phytochemistry* **1998**, *49*, 1395.
- [312] Y.H. Jo, S.B. Kim, J.H. Ahn, A. Turk, E. Kwon, M. Kim, B.Y. Hwang, M.K. Lee, *Bioorg. Chem.* **2019**, *92*, 103234.
